# Supplementary material for: Uncovering the Cryptic Gene Cluster ahb for 3-amino-4-hydroxybenzoate Derived Ahbamycins, by Searching SARP Regulator Encoding Genes in the Streptomyces argillaceus Genome
Source: MDPI journal article supplement (doi:10.3390/ijms24098197), 2023-05-03
Supplement: s1 [file s1]

## SUPPLEMENTARY MATERIAL

**Uncovering the cryptic gene cluster *ahb* for 3-amino-4-hydroxybenzoate derived ahbamycins, by searching SARP regulator encoding genes in the *Streptomyces argillaceus* genome**

**Suhui Ye,<sup>†‡</sup> Brian Molloy,<sup>†</sup> Ignacio Pérez-Victoria,<sup>#</sup> Ignacio Montero,<sup>†‡</sup> Alfredo F. Braña,<sup>†</sup> Carlos Olano,<sup>†‡</sup> Sonia Arca,<sup>†</sup>, Jesús Martín,<sup>#</sup> Fernando Reyes,<sup>#</sup> José A. Salas<sup>†‡</sup> and Carmen Méndez<sup>†‡</sup> \***

<sup>†</sup>Departamento de Biología Funcional e Instituto Universitario de Oncología del Principado de Asturias (I.U.O.P.A), Universidad de Oviedo, Oviedo, Spain

<sup>‡</sup>Instituto de Investigación Sanitaria de Asturias (ISPA), Oviedo, Spain

<sup>#</sup>Fundación MEDINA, Centro de Excelencia en Investigación de Medicamentos Innovadores en Andalucía, Armilla, Granada, Spain.

\* Correspondence: Carmen Méndez ([cmendezf@uniovi.es](mailto:cmendezf@uniovi.es))

**Table S1.** Secondary metabolite gene clusters identified in *S. argillaceus* using antiSMASH 6.0

| Cluster | Type                                           | From      | to        | Predicted product         |
|---------|------------------------------------------------|-----------|-----------|---------------------------|
| 1       | Butyrolactone                                  | 128,191   | 136,902   | Unknown                   |
| 2       | Thiopeptide, PKS-like                          | 171,777   | 225,841   | Lactazole                 |
| 3       | Lanthipeptide-class III                        | 401,954   | 424,038   | SapB                      |
| 4       | NRPS-like                                      | 560,900   | 599,983   | Unknown                   |
| 5       | Type II PKS,<br>oligosaccharide                | 819,530   | 891,026   | Mithramycin [18]          |
| 6       | Lasso peptide, RiPP-like                       | 1,034,574 | 1,056,293 | Citrulassin D             |
| 7       | Type II PKS                                    | 1,062,634 | 1,135,149 | Spore pigment             |
| 8       | NAPAA                                          | 1,638,191 | 1,672,045 | $\epsilon$ -Poly-L-Lysine |
| 9       | Ectoine                                        | 1,875,607 | 1,886,011 | Ectoine                   |
| 10      | TransAT-PKS-like, NRPS-like                    | 2,346,931 | 2,423,228 | Largimycins [20]          |
| 11      | Melanin                                        | 2,866,180 | 2,875,776 | Melanin                   |
| 12      | NI-Siderophore                                 | 2,971,449 | 2,982,026 | Desferrioxamine B [19]    |
| 13      | NRPS                                           | 3,407,302 | 3,461,180 | Unknown                   |
| 14      | Terpene                                        | 5,232,759 | 5,251,815 | Albaflavenone             |
| 15      | Lanthipeptide-class II                         | 5,316,978 | 5,340,023 | Unknown                   |
| 16      | Siderophore                                    | 5,836,456 | 5,847,118 | Unknown                   |
| 17      | Type I PKS                                     | 6,055,193 | 6,122,436 | Argimycins P [17]         |
| 18      | RiPP-like                                      | 6,309,087 | 6,319,089 | Unknown                   |
| 19      | Terpene, butyrolactone                         | 6,346,491 | 6,367,657 | $\gamma$ -butyrolactone   |
| 20      | NI-Siderophore                                 | 6,488,758 | 6,501,948 | Unknown                   |
| 21      | Indole                                         | 6,700,660 | 6,721,835 | Unknown                   |
| 22      | Terpene                                        | 6,916,343 | 6,942,645 | Hopene                    |
| 23      | hgIE-KS-Type I PKS                             | 6,991,030 | 7,043,896 | Unknown                   |
| 24      | RiPP-like                                      | 7,270,946 | 7,281,161 | Unknown                   |
| 25      | Melanin                                        | 7,430,918 | 7,441,352 | Unknown                   |
| 26      | Terpene                                        | 7,564,422 | 7,590,728 | Isorenieratene [19]       |
| 27      | NRPS, Type I PKS                               | 7,905,486 | 7,954,919 | Antimycin [19]            |
| 28      | Thioamide-NRP, NRPS,<br>lanthipeptide-class II | 8,021,022 | 8,112,102 | Unknown                   |
| 29      | Lanipeptide-class I                            | 8,224,262 | 8,249,451 | Unknown                   |
| 30      | Lasso peptide                                  | 8,450,703 | 8,473,371 | Unknown                   |
| 31      | NRPS                                           | 8,614,230 | 8,667,317 | Unknown                   |

hgIE-KS, Heterocyst glycolipid synthase-like PKS; NI-siderophore, NRPS-independent; NAPAA, Non-alpha poly-amino acids like  $\epsilon$ -Polylysine; NRPS, Non-Ribosomal Peptide Synthetase; PKS, Polyketide Synthase; RiPP, Ribosomally synthesized and post-translationally modified peptide.

**Table S2.** Predicted functions of genes in the *Streptomyces argillaceus* *ahb* gene cluster

| <i>ahb</i> * | aa  | Predicted function                                    | <i>rah</i> *      | <i>oah</i> *      | <i>dah</i> *      | <i>pah</i> *      | <i>tah</i> *      |
|--------------|-----|-------------------------------------------------------|-------------------|-------------------|-------------------|-------------------|-------------------|
| <i>ahbO1</i> | 281 | 2OG-Fe(II) oxygenase                                  | WP_217236194 (94) | WP_189953973 (92) | WP_202919556 (92) | WP_079170665 (91) | WP_159539127 (89) |
| <i>ahbM1</i> | 182 | Methylated-DNA-[protein]-cysteine S-methyltransferase | WP_217236059 (89) | WP_189953954 (84) | WP_152883716 (89) | WP_055572750 (87) | WP_159536550 (88) |
| <i>ahbM2</i> | 254 | MGMT family protein                                   | WP_217236195 (89) | WP_189953956 (89) | WP_152883945 (91) | WP_095534003 (86) | WP_159536551 (84) |
| <i>ahbR1</i> | 197 | RNA polymerase sigma factor                           | WP_217236060 (94) | WP_189953958 (93) | WP_152883713 (95) | WP_055572748 (93) | WP_159536552 (88) |
| <i>ahbR2</i> | 258 | AfsR/SARP family transcriptional regulator            | WP_217236061 (91) | WP_189953960 (87) | WP_152883711 (93) | WP_055572747 (89) | WP_159536553 (87) |
| <i>ahbP1</i> | 322 | PfkB family carbohydrate kinase                       | WP_217236062 (90) | ---               | WP_152883709 (90) | ---               | WP_159536554 (89) |
| <i>ahbA</i>  | 406 | Methionine adenosyltransferase                        | WP_217236063 (93) | WP_189948684 (93) | WP_152883707 (95) | WP_055572746 (92) | WP_159536555 (92) |
| <i>ahbS</i>  | 469 | 3-carboxy-cis,cis-muconate cycloisomerase             | WP_217236064 (92) | WP_189948686 (89) | ---               | WP_055572745 (92) | WP_159536556 (86) |
| <i>ahbK1</i> | 656 | FAD/NAD(P)-binding protein                            | WP_217236065 (89) | WP_189948687 (89) | WP_152883705 (89) | WP_055572744 (86) | WP_159536557 (87) |
| <i>ahbM3</i> | 337 | Methyltransferase                                     | WP_217236066 (94) | WP_189948689 (94) | WP_152883703 (94) | WP_055572743 (92) | WP_159536558 (94) |
| <i>ahbL1</i> | 572 | Acyl-CoA ligase                                       | WP_217236067 (91) | WP_189948692 (92) | WP_152883700 (94) | WP_055572742 (91) | WP_159536559 (89) |
| <i>ahbO2</i> | 584 | FAD-dependent monooxygenase                           | WP_217236068 (90) | WP_189948694 (91) | WP_152883698 (92) | WP_055572741 (92) | WP_006124753 (ND) |
| <i>ahbR3</i> | 290 | AfsR/SARP family transcriptional regulator            | WP_217236069 (93) | WP_229851348 (88) | WP_152883695 (90) | WP_074993823 (90) | WP_159536560 (80) |
| <i>ahbT1</i> | 536 | MFS transporter                                       | WP_217236070 (86) | WP_189948698 (87) | WP_152892632 (91) | SDC40704.1 (89)   | WP_159536561 (78) |
| <i>ahbK2</i> | 268 | SDR family oxidoreductase                             | WP_217236071 (99) | WP_189948700 (97) | WP_152892631 (98) | WP_055574900 (97) | WP_159536562 (99) |
| <i>ahbC</i>  | 208 | Cupin domain-containing protein                       | WP_217236072 (97) | WP_229851349 (96) | WP_152892630 (98) | WP_074993828 (96) | WP_159536563 (96) |
| <i>ahbK3</i> | 566 | FAD-binding oxidoreductase                            | WP_217236073 (89) | WP_229851350 (90) | WP_152892629 (89) | WP_079039606 (90) | WP_159536564 (86) |
| <i>ahbM4</i> | 220 | Class I SAM-dependent methyltransferase               | WP_217236074 (95) | WP_189948706 (95) | WP_152892628 (96) | WP_055570494 (95) | WP_159536565 (96) |
| <i>ahbK4</i> | 188 | Flavin reductase family protein                       | WP_217236075 (93) | WP_010070850 (ND) | WP_152892627 (92) | WP_055570493 (93) | WP_159536566 (89) |
| <i>ahbO3</i> | 550 | Aromatic ring hydroxylase                             | WP_217236076 (98) | WP_189948710 (98) | WP_152892626 (97) | WP_055570492 (99) | WP_159536567 (97) |
| <i>ahbT2</i> | 405 | MFS transporter                                       | WP_217236077 (93) | WP_189948712 (91) | WP_152892625 (93) | WP_074993830 (93) | WP_159536568 (90) |
| <i>ahbR4</i> | 305 | Helix-turn-helix domain-containing protein            | WP_217236078 (91) | WP_189948715 (87) | WP_152892624 (93) | WP_074993831 (88) | WP_159536569 (84) |
| <i>ahbL2</i> | 584 | Acyl-CoA ligase                                       | WP_217236079 (86) | WP_189948717 (84) | WP_152892623 (90) | WP_055574594 (87) | WP_006124740 (ND) |
| <i>ahbH</i>  | 369 | 3-dehydroquinate synthase II family protein           | WP_217236080 (97) | WP_189948720 (95) | WP_006124740 (ND) | WP_074993834 (97) | WP_159536570 (94) |
| <i>ahbI</i>  | 271 | Fructose-bisphosphate aldolase                        | WP_217236196 (94) | WP_189948963 (97) | WP_152892636 (94) | WP_079039969 (95) | WP_159539129 (94) |
| <i>ahbK5</i> | 550 | FAD-binding oxidoreductase                            | WP_217236081 (92) | WP_229851351 (90) | WP_152892622 (93) | WP_095534094 (94) | WP_208026539 (90) |
| <i>ahbO4</i> | 502 | FAD-dependent monooxygenase                           | WP_217236082 (93) | WP_189948723 (90) | WP_152892621 (92) | WP_055694972 (94) | WP_159536571 (92) |
| <i>ahbF</i>  | 299 | Methylenetetrahydrofolate reductase                   | WP_217236083 (91) | WP_189948725 (90) | WP_152892620 (89) | WP_055572786 (90) | WP_159536572 (89) |
| <i>ahbP2</i> | 327 | Carbohydrate kinase family protein                    | WP_217236084 (90) | WP_189948727 (89) | WP_152892635 (91) | WP_055572784 (91) | WP_159536574 (89) |
| <i>ahbR5</i> | 100 | Metal-binding protein                                 | WP_217236197 (85) | WP_189948729 (80) | WP_202919764 (82) | WP_079039791 (86) | ---               |
| <i>ahbT3</i> | 173 | ABC transporter substrate-binding protein             | WP_217236085 (87) | WP_229851352 (82) | WP_152892619 (84) | WP_055572783 (87) | ---               |

\* *ahb*, *S. argillaceus* ATCC 12956; *rah*, *Streptomyces* sp. AC555\_RSS877; *oah*, *S. roseolus* JCM 4411; *dah*, *S. adustus* NBRC 109810; *pah*, *S. prasinopilosus* CGMCC 4.3504; *tah*, *Streptomyces* sp. Tü 3180. Numbers between brackets indicate percentage of identical amino acids to the corresponded Ahb protein. ND, not determined. aa, number of amino acids of Ahb proteins.

**Table S3.** Oligonucleotides used for PCR amplification (restriction sites are underlined).

| PRIMER               | SEQUENCE 5'-3'                |
|----------------------|-------------------------------|
| Delta ASU A fwd      | GGGGAATTCGAAGAAGCGGACGTTCTCG  |
| Delta ASU A rev      | CGGCTGCAGATCGTGCAGGACGACTGG   |
| Delta ASU B fwd      | CGGGGATCCGGACACGGAGTGGTCCAG   |
| Delta ASU B rev      | TTGGATATCGGTACGTCAGGAGGAACACC |
| Delta 1705A fwd      | CACGAATTCAGGTGAGGGGTGTGGTAAC  |
| Delta 17054A rev     | CGTTCCTGTACCGGGTCTC           |
| Delta 1705B fwd      | ACCGGATCCTGCAGCAGGTGAAGAAGAAG |
| Delta 1705B rev      | GTTGATATCCGCGTAGTAGTCGGAGTTGG |
| AHBAermE fwd         | GGATCCATCCGAACCCTGTGACCAG     |
| AHBAermE rev         | GAATTCTGACCACCACGTAGCAGAAC    |
| SARP1304 fwd         | CTGCAGGGCTCTCCTACGCTCTCTCA    |
| SARP1304 rev         | CTGCAGCTGCCTTGTCTCCATCAC      |
| SARP1705 fwd         | TCTAGATTCCAGAGGGATGACCTCCT    |
| SARP1705 rev         | TCTAGAGTGGGCGCCCTGGTCTGG      |
| 1705araC fwd         | CATCACCTGGTGACCGGCGCGG        |
| 1705araC rev         | CCCGGCTACCGGCTCGGGA           |
| Check Delta AHBA fwd | ACCAGGACCGTTGTGTCATC          |
| Check Delta AHBA rev | CTGTGACCAGGAACGAGGAG          |
| d1705compr_A         | AACATGTCGTCCCGGTC             |
| d1705compr_B         | TTCCAGAACAGCACCTTCT           |
| ApraC rev            | TCATTCTGTGGGCCGTAC            |
| ApraC fw             | TCATTCTGTGGGCCGTAC            |

**Table S4.** NMR data for **AHB18** (CD<sub>3</sub>OD, 24 °C, 500 MHz/125 MHz).

| Position           | $\delta_H$ (ppm), mult. ( <i>J</i> in Hz) | $\delta_C$ (ppm), type |
|--------------------|-------------------------------------------|------------------------|
| 2                  | 3.57, at (7.6)                            | 38.2, CH <sub>2</sub>  |
| 3                  | 2.72, ddd (7.6, 7.6, 4.5)                 | 22.9, CH <sub>2</sub>  |
| 4                  | 7.09, at (4.5)                            | 130.9, CH              |
| 4a                 | -                                         | 128.4, C               |
| 5                  | -                                         | 123.1, C               |
| 6                  | -                                         | 168.3, C               |
| 7                  | 5.50, s                                   | 94.0, CH               |
| 7a                 | -                                         | 166.3, C               |
| 8                  | 7.22, d (11.1)                            | 129.1, CH              |
| 9                  | 6.94, m                                   | 126.4, CH              |
| 10                 | 6.46, m                                   | 142.9, CH              |
| 11                 | 2.03, br d (6.8)                          | 17.8, CH <sub>3</sub>  |
| 1'                 | -                                         | 126.4, C               |
| 2'                 | 7.86, br s                                | 127.8, CH              |
| 3'                 | -                                         | 124.3, C               |
| 4'                 | -                                         | 155.0, C               |
| 5'                 | 7.00 d, (8.9)                             | 115.7, CH              |
| 6'                 | 7.87, br d                                | 130.4, CH              |
| 7'                 | -                                         | 170.5, C               |
| <b>Nitrogen</b>    | <b><math>\delta_N</math> (ppm)</b>        |                        |
| 1                  | 108                                       |                        |
| 3' NH <sub>2</sub> | 110                                       |                        |

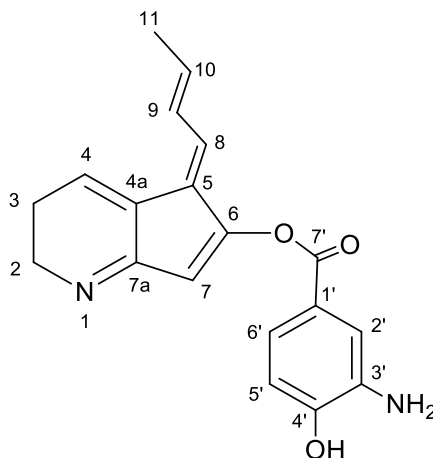

<sup>13</sup>C chemical shifts determined from the indirect dimension of HSQC and HMBC spectra. <sup>15</sup>N chemical shift scale corresponds to Bruker's default ammonia reference.

**Table S5a.** NMR data for keto form of **AHB74** (CD<sub>3</sub>OD, 24 °C, 500 MHz/125 MHz).

| Position | $\delta_H$ (ppm), mult. ( <i>J</i> in Hz) | $\delta_C$ (ppm), type |
|----------|-------------------------------------------|------------------------|
| 1        | -                                         | 122.3, C               |
| 2        | 6.96, d (1.9)                             | 111.2, CH              |
| 3        | -                                         | 135.5, C               |
| 4        | -                                         | 149.2, C               |
| 5        | 6.76, d (8.1)                             | 113.5, CH              |
| 6        | 7.18, dd (8.1, 1.9)                       | 120.2, CH              |
| 7        | -                                         | 168.1, C               |
| 1'       | 2.14, s                                   | 26.0, CH <sub>3</sub>  |
| 2'       | -                                         | 210.5, C               |
| 3'       | 4.12, quart (7.0)                         | 58.1, CH               |
| 4'       | 1.34, d (7.0)                             | 17.4, CH <sub>3</sub>  |

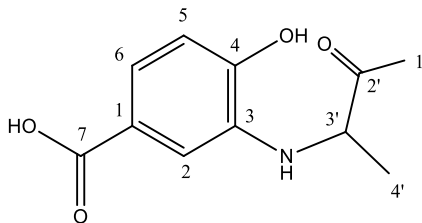

<sup>13</sup>C chemical shifts determined from the indirect dimension of HSQC and HMBC spectra.

**Table S5b.** NMR data for hemiketal form of **AHB74** (CD<sub>3</sub>OD, 24 °C, 500 MHz/125 MHz). Non isochronous signals of both hemiketal epimers (at position 2') are indicated.

| Position      | $\delta_H$ (ppm), mult. ( <i>J</i> in Hz) | $\delta_C$ (ppm), type |
|---------------|-------------------------------------------|------------------------|
| 1             | -                                         | 123.5, C               |
| 2             | 7.23, m                                   | 115.9, CH              |
| 3             | -                                         | 133.2, C               |
| 4             | -                                         | 146.4, C               |
| 5             | 6.68, d (8.3)                             | 116.3, CH              |
| 6             | 7.17, m                                   | 119.9, CH              |
| 7             | -                                         | 167.9, C               |
| 1' (epimer a) | 1.41, s                                   | 24.7, CH <sub>3</sub>  |
| 1' (epimer b) | 1.25, s                                   | 21.3, CH <sub>3</sub>  |
| 2' (epimer a) | -                                         | 96.4, C                |
| 2' (epimer b) | -                                         | 98.5, C                |
| 3' (epimer a) | 3.14, quart. (6.3)                        | 52.5, CH               |
| 3' (epimer b) | 3.13, quart. (6.3)                        |                        |
| 4' (epimer a) | 1.14, d (6.3)                             | 16.3, CH <sub>3</sub>  |
| 4' (epimer b) | 1.10, d (6.3)                             | 16.7, CH <sub>3</sub>  |

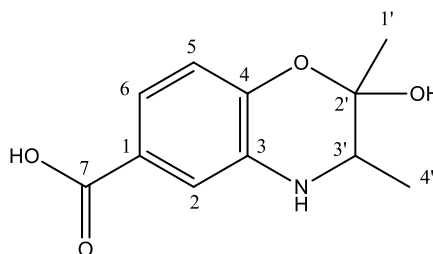

<sup>13</sup>C chemical shifts determined from the indirect dimension of HSQC and HMBC spectra.

**Table S6.** NMR data for **AHB75** (DMSO-d<sub>6</sub>, 24 °C, 500 MHz/125 MHz).

| Position | $\delta_H$ (ppm), mult. ( <i>J</i> in Hz) | $\delta_C$ (ppm), type |
|----------|-------------------------------------------|------------------------|
| 1a       | -                                         | 149.1, C               |
| 1        | 8.28, s                                   | 113.9, CH              |
| 2        | -                                         | 138.5, C               |
| 2-NH     | 9.77, s                                   | -                      |
| 3        | -                                         | 180.2, C               |
| 4        | 6.54, s                                   | 104.9, CH              |
| 4a       | -                                         | 150.2, C               |
| 5a       | -                                         | 146.3, C               |
| 6        | 7.63, d (8.6)                             | 117.1, CH              |
| 7        | 8.12, dd (8.6, 2.0)                       | 132.6, CH              |
| 8        | -                                         | 128.6, C               |
| 9        | 8.29, d (2.0)                             | 130.8, CH              |
| 9a       | -                                         | 133.6, C               |
| 10       | -                                         | 166.6, C               |
| 11       | -                                         | 171.3, C               |
| 12       | 2.25, s                                   | 24.9, CH               |

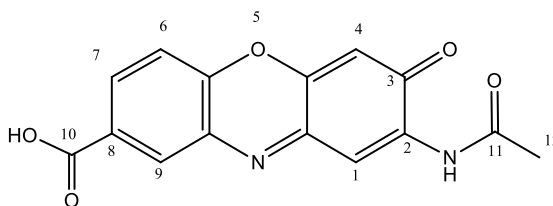

<sup>13</sup>C chemical shifts determined from the indirect dimension of HSQC and HMBC spectra.

**Table S7a.** NMR data for the keto form of **AHB76** (DMSO-d<sub>6</sub>, 24 °C, 500 MHz/125 MHz).

| Position | $\delta_H$ (ppm), mult. ( <i>J</i> in Hz) | $\delta_C$ (ppm), type |
|----------|-------------------------------------------|------------------------|
| 1        | -                                         | 122.5, C               |
| 2        | 6.92, d (1.6)                             | 110.9, CH              |
| 3        | -                                         | 135.9, C               |
| 4        | -                                         | 149.0, C               |
| 5        | 6.74, d (8.1)                             | 113.4, CH              |
| 6        | 7.15, dd (8.1, 1.8)                       | 119.8, CH              |
| 7        | -                                         | 168.3, C               |
| 1'       | 0.93, m                                   | 8.0, CH <sub>3</sub>   |
| 2'       | 2.61, m<br>2.50, m                        | 31.1, CH <sub>2</sub>  |
| 3'       | -                                         | 213.2, C               |
| 4'       | 4.14, quart (7.0)                         | 57.4, CH               |
| 5'       | 1.33, d (7.0)                             | 17.8, CH <sub>3</sub>  |

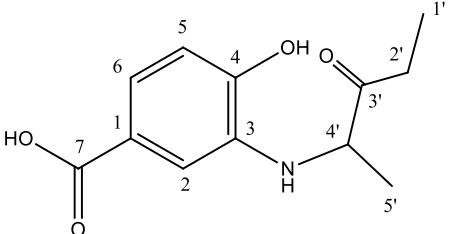

<sup>13</sup>C chemical shifts determined from the indirect dimension of HSQC and HMBC spectra.

**Table S7b.** NMR data for the hemiketal form of **AHB76** (DMSO-d<sub>6</sub>, 24 °C, 500 MHz/125 MHz). Non isochronous signals of both hemiketal epimers (at position 3') are indicated.

| Position      | $\delta_H$ (ppm), mult. ( <i>J</i> in Hz) | $\delta_C$ (ppm), type |
|---------------|-------------------------------------------|------------------------|
| 1             | -                                         | 123.7, C               |
| 2             | 7.20, d (1.2)                             | 115.7, CH              |
| 3             | -                                         | 134.0, C               |
| 4             | -                                         | 146.2, C               |
| 5             | 6.67, d (8.1)                             | 116.2, CH              |
| 6             | 7.12, m                                   | 119.4, CH              |
| 7             | -                                         | 168.1, C               |
| 1' (epimer a) | 0.96, t (7.5)                             | 7.6, CH <sub>3</sub>   |
| 1' (epimer b) | 0.90, t (7.6)                             | 7.0, CH <sub>3</sub>   |
| 2' (epimer a) | 1.77, dq (15.2, 7.5); 1.66, m             | 30.2, CH <sub>2</sub>  |
| 2' (epimer b) | 1.60, m                                   | 26.9, CH <sub>2</sub>  |
| 3' (epimer a) | -                                         | 97.7, C                |
| 3' (epimer b) | -                                         | 98.8, C                |
| 4' (epimer a) | 3.18, quart. (6.5)                        | 50.1, CH               |
| 4' (epimer b) | 3.22, m                                   | 51.5, CH               |
| 5' (epimer a) | 1.10, d (6.5)                             | 16.1, CH <sub>3</sub>  |
| 5' (epimer b) | 1.06, d (6.5)                             | 16.9, CH <sub>3</sub>  |

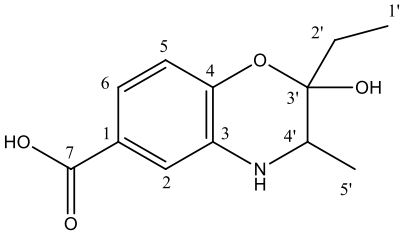

<sup>13</sup>C chemical shifts determined from the indirect dimension of HSQC and HMBC spectra.

**Table S8.** NMR data for **AHB77** (DMSO-d<sub>6</sub>, 24 °C, 500 MHz/125 MHz).

| Position | $\delta_H$ (ppm), mult. ( <i>J</i> in Hz) | $\delta_C$ (ppm), type |
|----------|-------------------------------------------|------------------------|
| 1        | -                                         | 125.2, C               |
| 2        | 7.99, d (2.1)                             | 128.4, CH              |
| 3        | -                                         | 134.0, C               |
| 4        | -                                         | 148.2, C               |
| 5        | 7.10, d (8.3)                             | 117.2, CH              |
| 6        | 7.73, m                                   | 128.4, CH              |
| 7        | -                                         | 167.6, C               |
| 8        | 6.42, d (6.7)                             | 85.7, CH               |
| 8-OH     | 7.74, m                                   | -                      |
| 9        | -                                         | 156.8, C               |
| 11       | -                                         | 112.5, C               |
| 12       | 8.16, d (2.9)                             | 131.2, CH              |
| 13       | 11.88, br s                               | -                      |
| 14       | -                                         | 137.5, C               |
| 15       | 7.50, br dt (7.6)                         | 112.5, CH              |
| 16       | 7.25, m                                   | 123.3, CH              |
| 17       | 7.22, m                                   | 121.6, CH              |
| 18       | 8.60, br dd (7.3)                         | 123.1, CH              |
| 19       | -                                         | 125.9, C               |

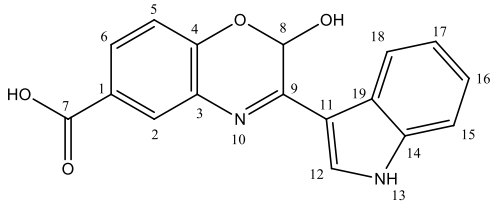
<sup>13</sup>C chemical shifts determined from the indirect dimension of HSQC and HMBC spectra.**Table S9.** NMR data for **AHB118** (DMSO-d<sub>6</sub>, 24 °C, 500 MHz/125 MHz). Non isochronous signals of both hemicetal epimers (at position 1') are indicated.

| Position      | $\delta_H$ (ppm), mult. ( <i>J</i> in Hz) | $\delta_C$ (ppm), type |
|---------------|-------------------------------------------|------------------------|
| 1             | -                                         | 123.7, C               |
| 2             | 7.23, d (1.8)                             | 115.5, CH              |
| 3             | -                                         | 134.0, C               |
| 4             | -                                         | 145.2, C               |
| 5             | 6.70, d (8.2)                             | 116.4, CH              |
| 6             | 7.12, dd (8.2, 1.8)                       | 119.0, CH              |
| 7             | -                                         | 168.0, C               |
| 1' (epimer a) | 5.29, d (3.2)                             | 90.4, CH               |
| 1' (epimer b) | 5.44, d (1.4)                             | 90.3, CH               |
| 2' (epimer a) | 3.11, ddd (6.3, 6.3, 3.3)                 | 55.7, CH               |
| 2' (epimer b) | 3.27, ddd (6.4, 6.4, 1.9)                 | 54.9, CH               |
| 3' (epimer a) | 3.45, m; 3.35, m                          | 62.0, CH <sub>2</sub>  |
| 3' (epimer b) | 3.57, dd (6.3, 3.8); 3.43, m              | 61.1, CH <sub>2</sub>  |

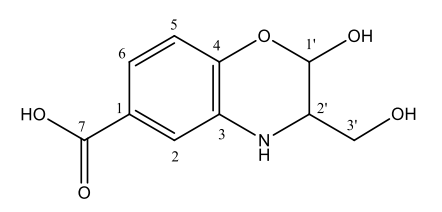
<sup>13</sup>C chemical shifts determined from the indirect dimension of HSQC and HMBC spectra.



**Table S10.** NMR data for **AHB119** (DMSO-d<sub>6</sub>, 24 °C, 500 MHz/125 MHz).

| Position | $\delta_H$ (ppm), mult. ( <i>J</i> in Hz) | $\delta_C$ (ppm), type |
|----------|-------------------------------------------|------------------------|
| 1        | -                                         | 121.8, C               |
| 2        | 8.42, d (1.9)                             | 124.1, CH              |
| 3        | -                                         | 126.6, C               |
| 3-NH     | 9.30, s                                   | -                      |
| 4        | -                                         | 152.8, C               |
| 5        | 6.92, d (8.3)                             | 115.5, CH              |
| 6        | 7.57, dd (8.3, 1.9)                       | 126.8, CH              |
| 7        | -                                         | 167.6, C               |
| 1'       | -                                         | 169.5, C               |
| 2'       | 2.11, s                                   | 24.1, CH <sub>3</sub>  |

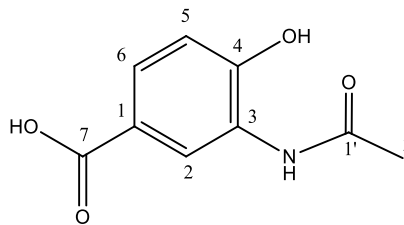

<sup>13</sup>C chemical shifts determined from the indirect dimension of HSQC and HMBC spectra.

**Table S11.** NMR data for **AHB120** (DMSO-d<sub>6</sub>, 24 °C, 500 MHz/125 MHz).

| Position | $\delta_H$ (ppm), mult. ( <i>J</i> in Hz) | $\delta_C$ (ppm), type |
|----------|-------------------------------------------|------------------------|
| 1        | -                                         | 121.8, C               |
| 2        | 8.42, d (1.9)                             | 124.1, CH              |
| 3        | -                                         | 126.6, C               |
| 3-NH     | 9.30, s                                   | -                      |
| 4        | -                                         | 152.8, C               |
| 5        | 6.92, d (8.3)                             | 115.5, CH              |
| 6        | 7.57, dd (8.3, 1.9)                       | 126.8, CH              |
| 7        | -                                         | 167.6, C               |
| 1'       | -                                         | 173.1, C               |
| 2'       | 2.41, quart. (7.6)                        | 29.7, CH <sub>2</sub>  |
| 3'       | 1.08, t (7.6)                             | 10.2, CH <sub>3</sub>  |

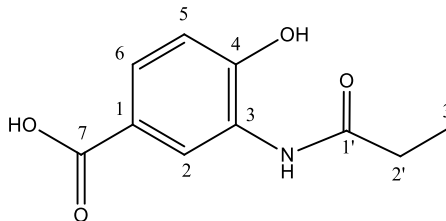

<sup>13</sup>C chemical shifts determined from the indirect dimension of HSQC and HMBC spectra.

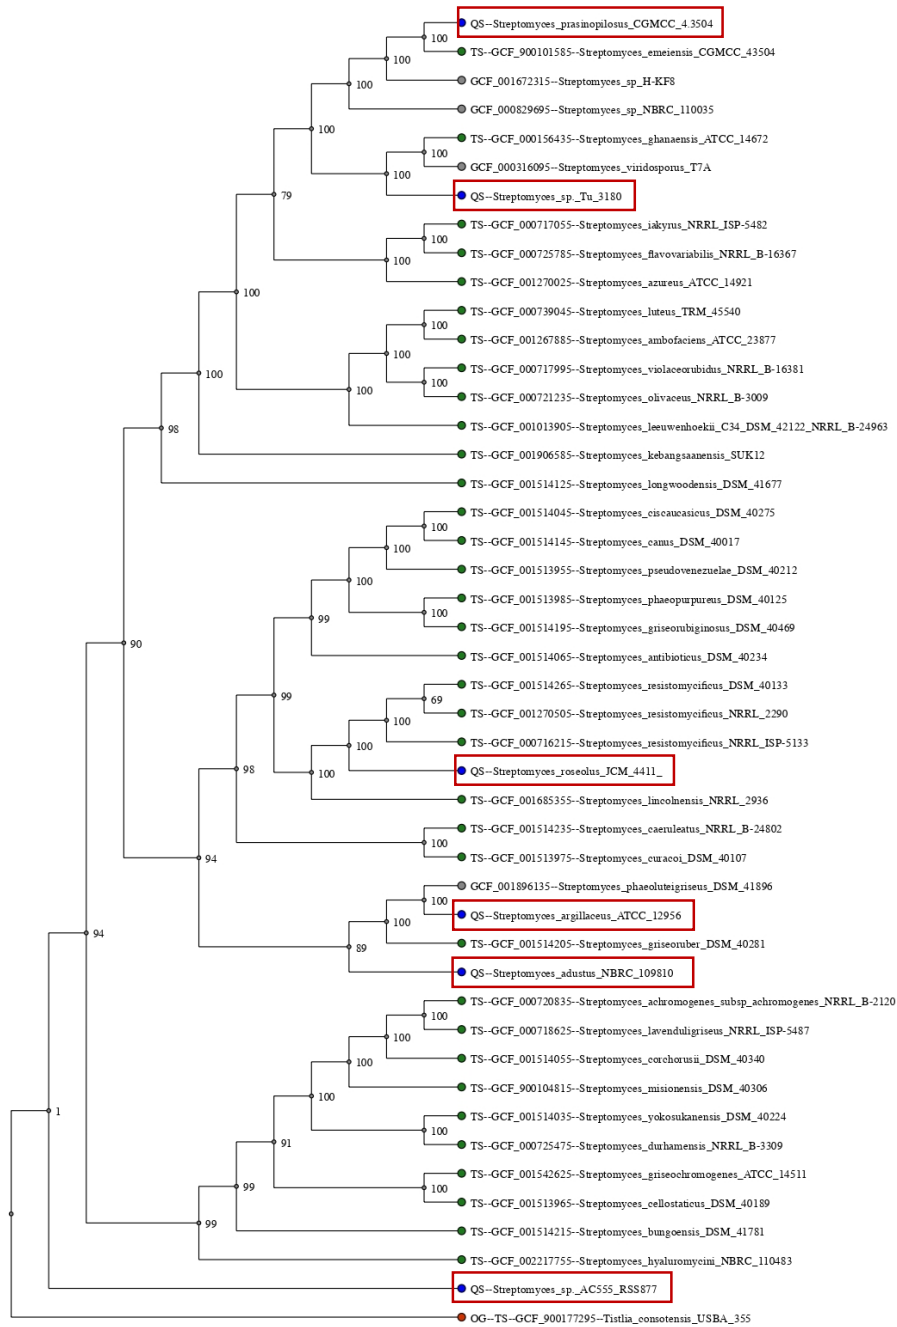

**Figure S1.** Phylogenetic analysis of *Streptomyces* strains containing *ahb* BGCs. The maximum-likelihood tree of the concatenated nucleotide sequences of 82 housekeeping genes were generated with autoMLST server [49]. An IQ-TREE Ultrafast Bootstrap analysis (1000 replicates) was performed, and ModelFinder was applied to find the optimal model for tree building. Genbank files containing the genomic sequences from the strains under study were used as inputs for phylogenetic inference using “de novo mode” pipeline, as in Cenicerós et al. [23]. Strains used for *ahb* clusters comparison are squared in red. TS: Type strain, QS: query sequence, OG: outgroup.

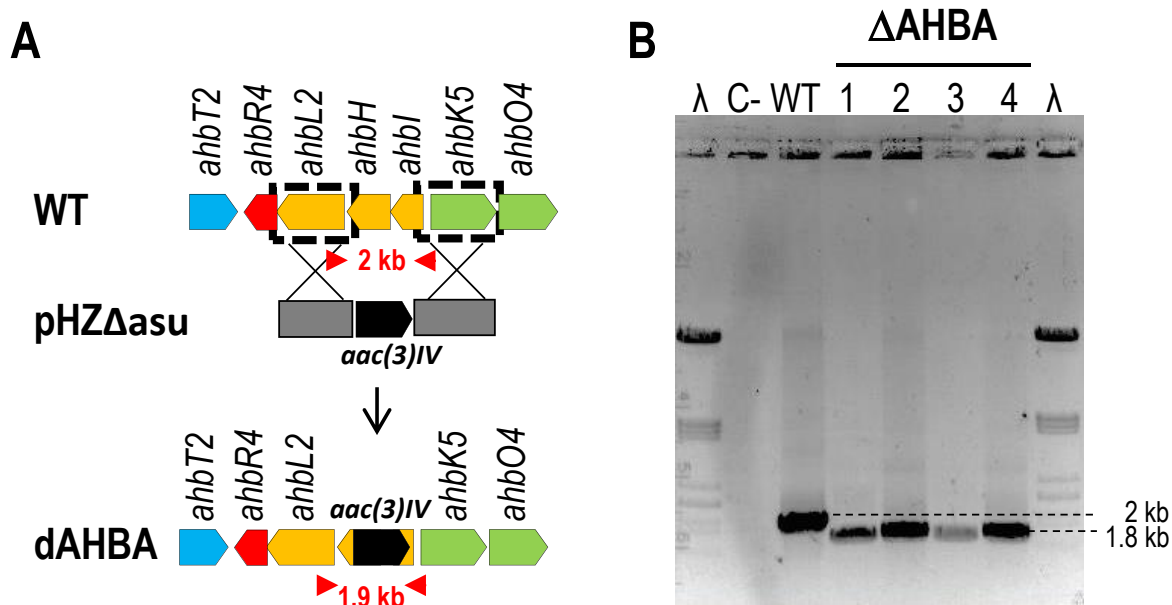

**Figure S2.** Generation of *S. argillaceus* ΔAHBA. (A) Graphical representation of the replacement event for the generation of ΔAHBA mutant strain; (B) PCR analysis of ΔAHBA mutant strain. PCR products from the wild type (WT) strain and from the ΔAHBA mutant using oligonucleotides Check Delta AHBA fw (a) and Check Delta AHBA rev (b). Negative control of the PCR reaction (-). λ, PstI-digested Lambda DNA. *aac(3)/IV*, apramycin resistance gene.

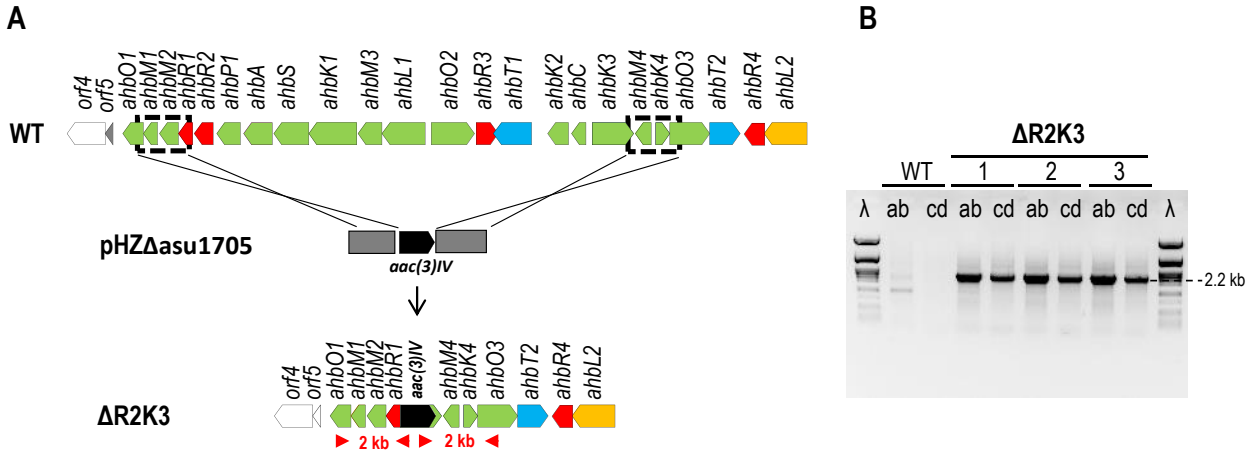

**Figure S3.** Generation of *S. argillaceus*  $\Delta R2K3$ . (A) Graphical representation of the replacement event for the generation of  $\Delta R2K3$  mutant strain; (B) PCR analysis of  $\Delta R2K3$  mutant strain. PCR products from the  $\Delta R2K3$  mutant using oligonucleotides d1705compr\_A (a) and ApraC rev (b), or d1705compr\_B (c) and ApraC fw (d). Oligonucleotides b and c anneals at the apramycin resistance gene. WT was used as negative control.  $\lambda$ , PstI-digested Lambda DNA. *aac(3)/IV*, apramycin resistance gene

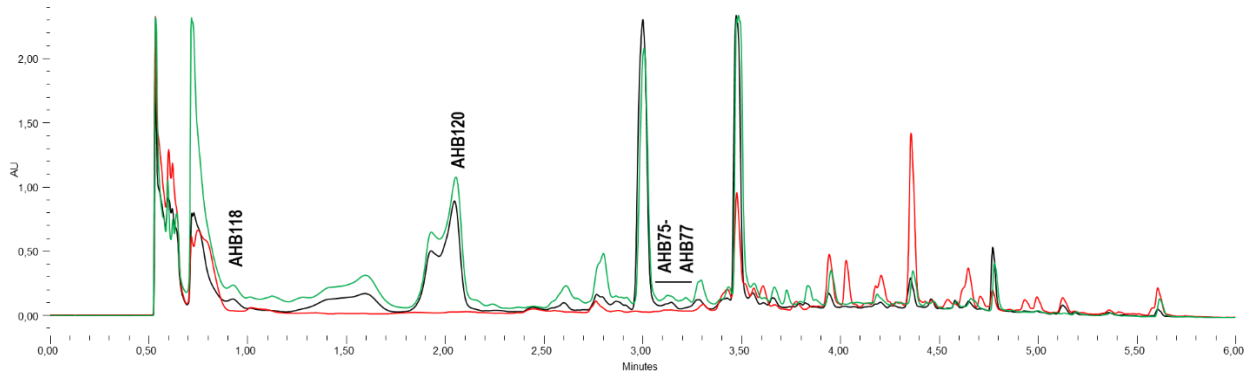

**Figure S4.** UPLC analysis of extracts of complemented *S. argillaceus*  $\Delta AHBA$  mutant. Chromatograms at 230 nm of extracts of *S. argillaceus* WT-pREG (black line), *S. argillaceus*  $\Delta AHBA$ -pREG (red line) and *S. argillaceus*  $\Delta AHBA$ -pREG-pSETeAHBAHyg (green line).

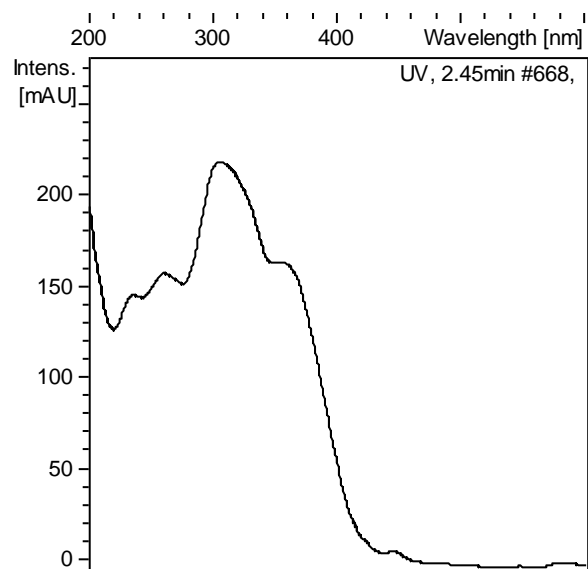

**Figure S5.** UV-vis (DAD) spectrum of **AHB18**.

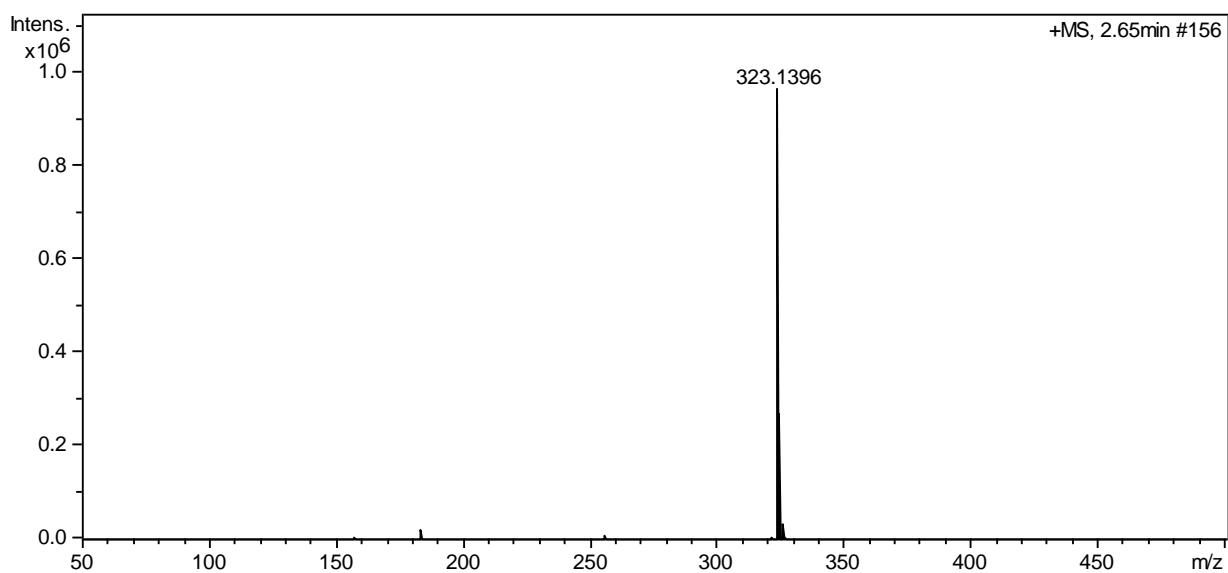

**Figure S6.** ESI-TOF HRMS spectrum of **AHB18**.

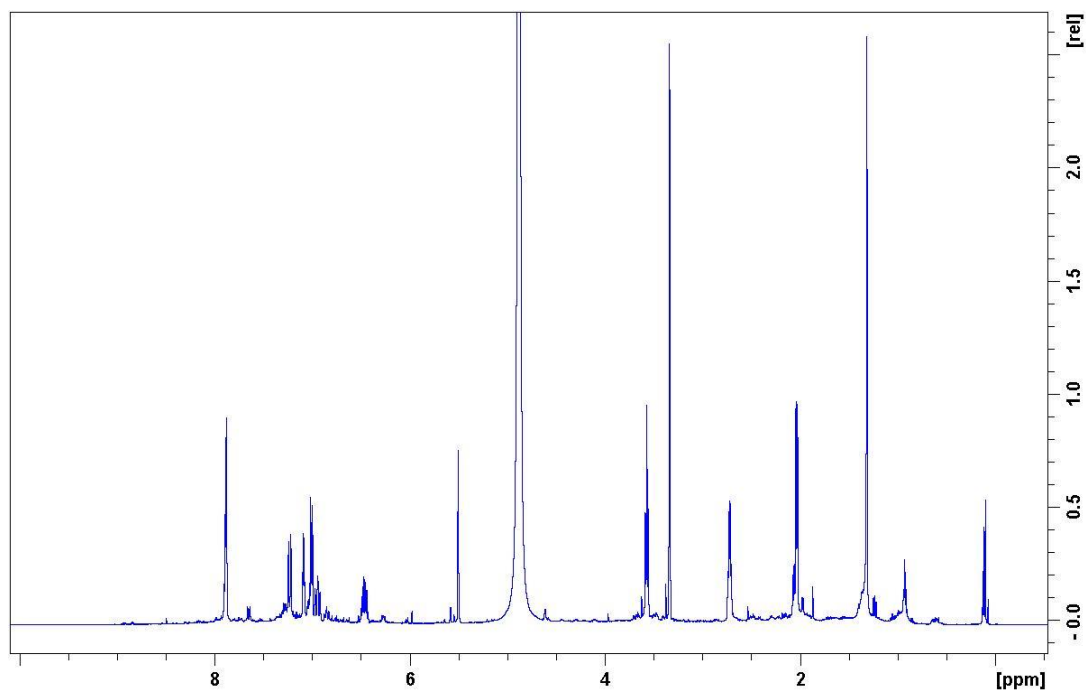

**Figure S7.**  $^1\text{H}$  spectrum of **AHB18** ( $\text{CD}_3\text{OD}$ , 24  $^\circ\text{C}$ , 500 MHz).

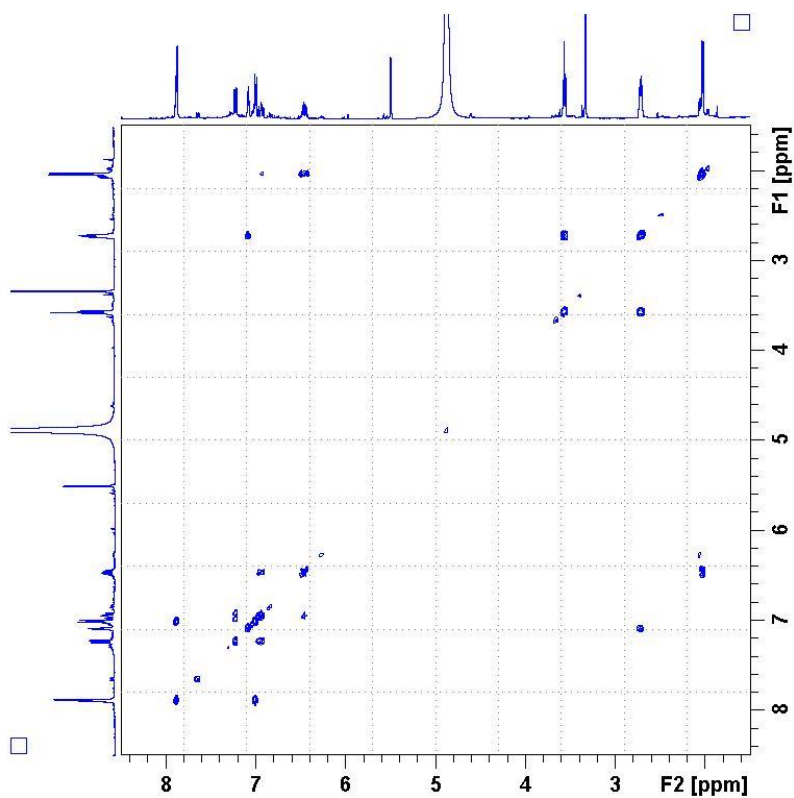

**Figure S8.** COSY spectrum of **AHB18**.

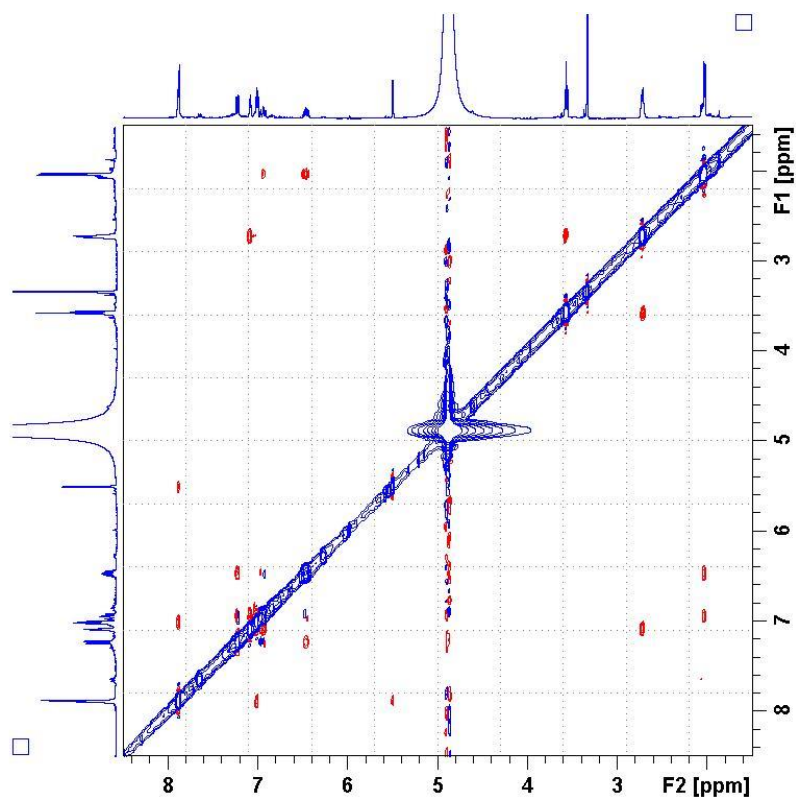

Figure S9. NOESY spectrum of **AHB18**.

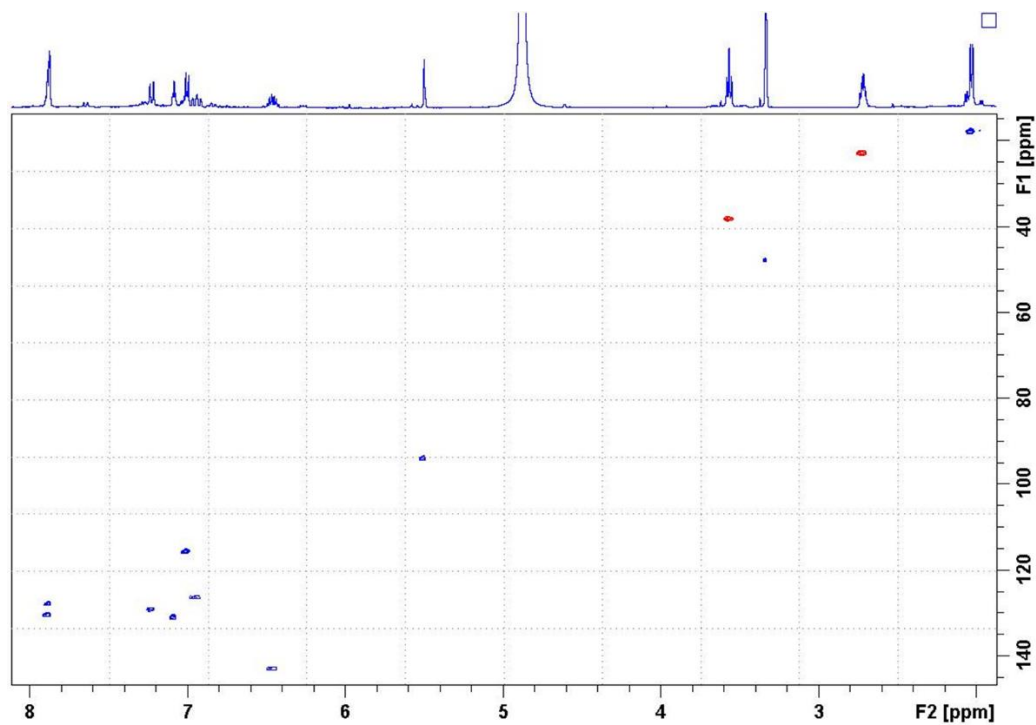

Figure S10. HSQC spectrum of **AHB18**.

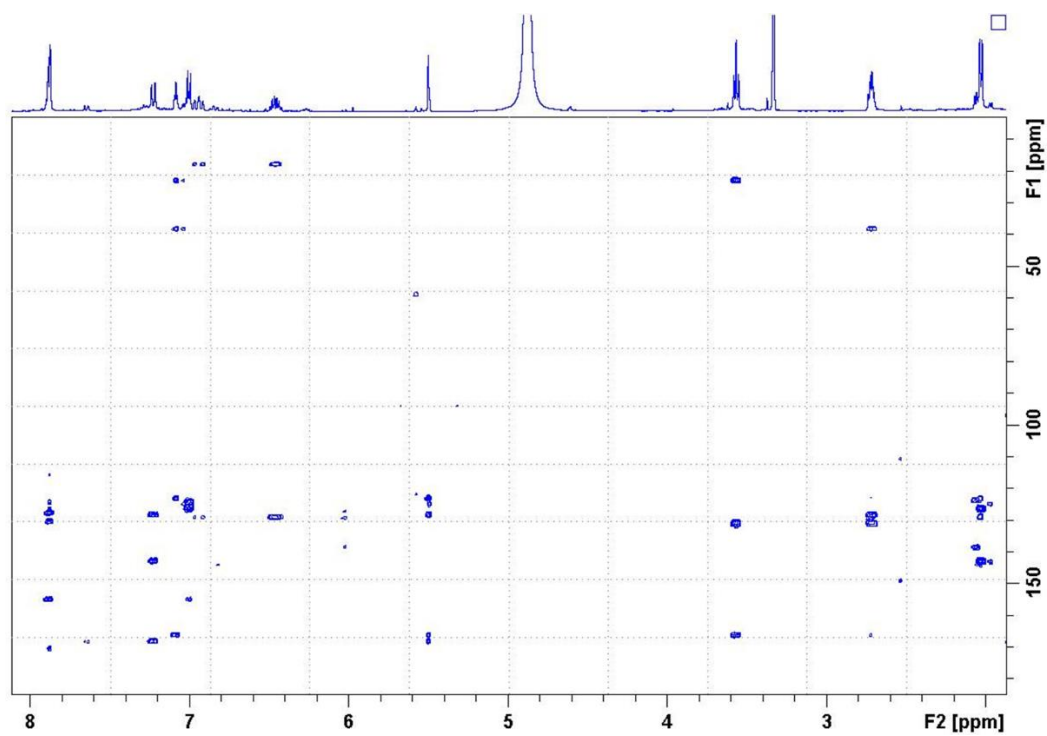

**Figure S11.**  $^1\text{H}$ - $^{13}\text{C}$  HMBC spectrum of **AHB18**.

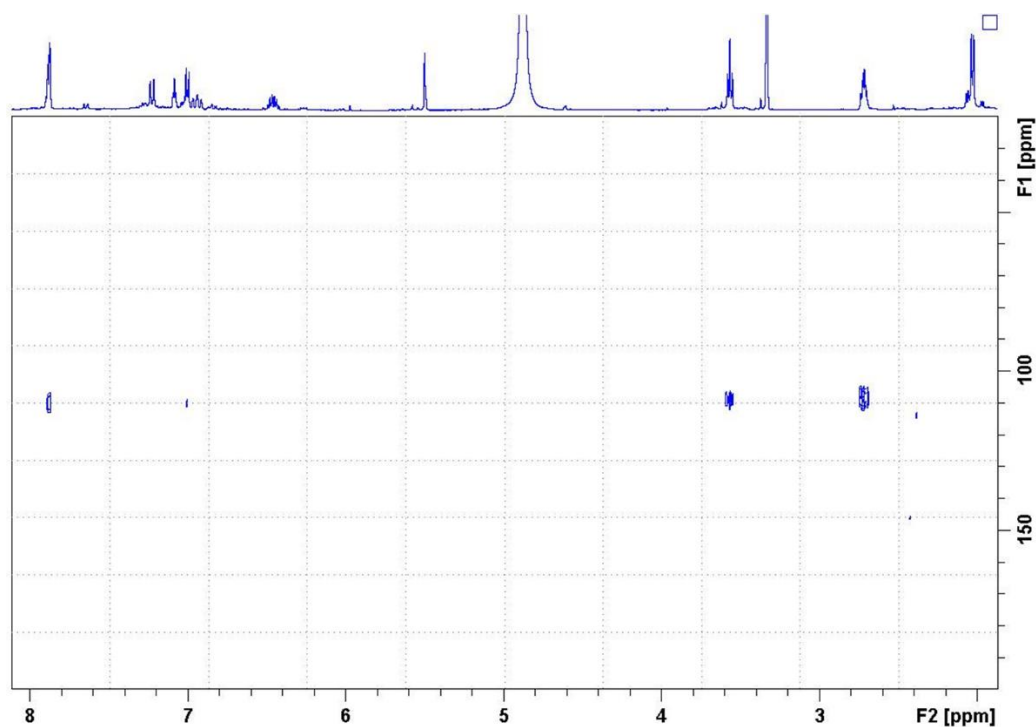

**Figure S12.**  $^1\text{H}$ - $^{15}\text{N}$  HMBC spectrum of **AHB18**.



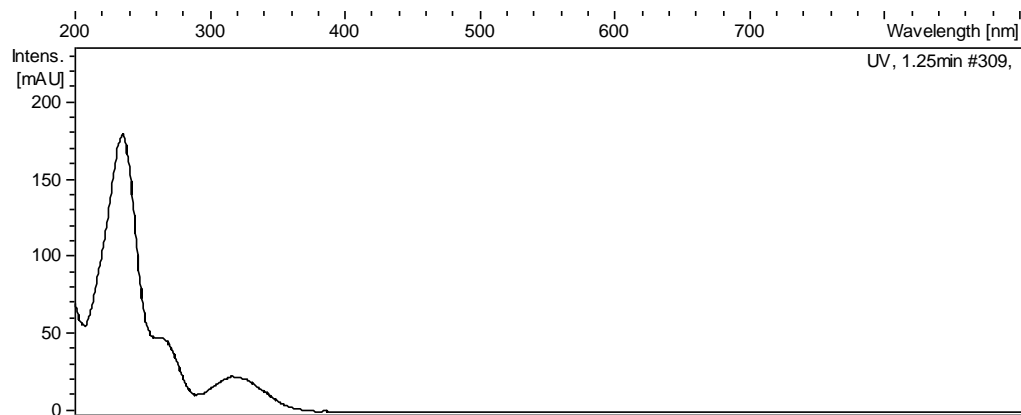

**Figure S13.** UV-vis (DAD) spectrum of **AHB74**.

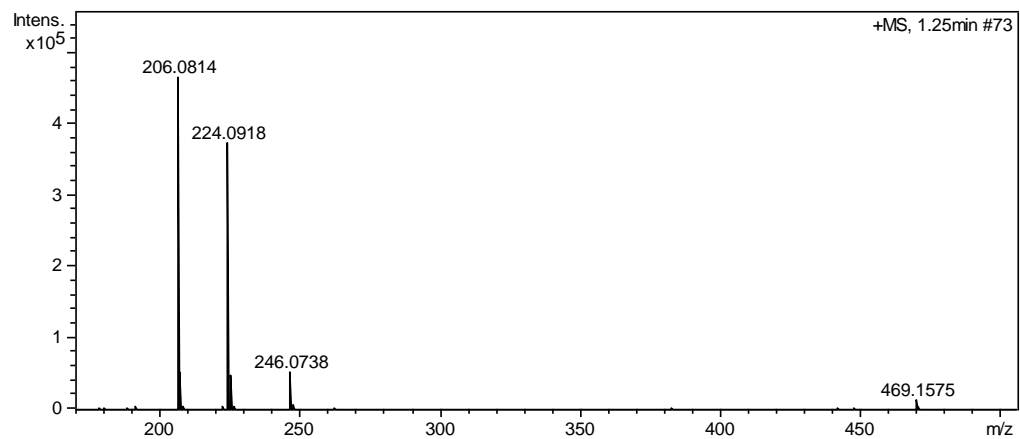

**Figure S14.** ESI-TOF HRMS spectrum of **AHB74**.

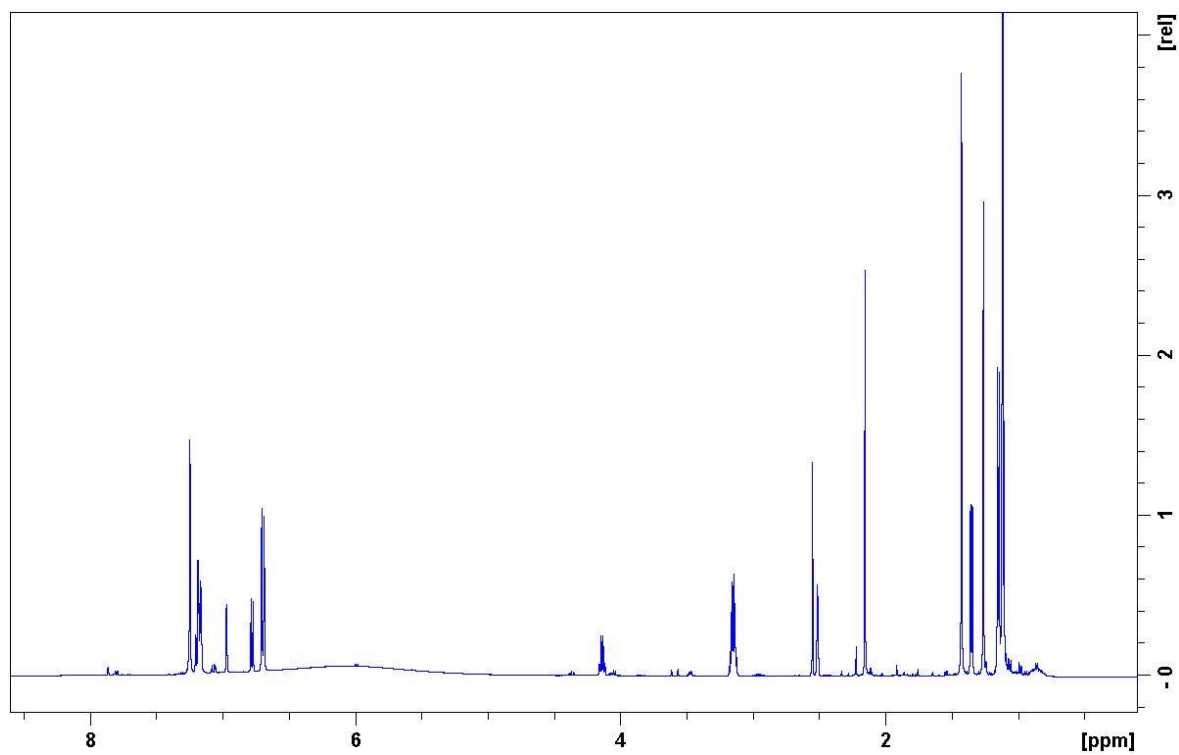

Figure S15.  $^1\text{H}$  spectrum of **AHB74** (DMSO- $\text{d}_6$ , 24 °C, 500 MHz).

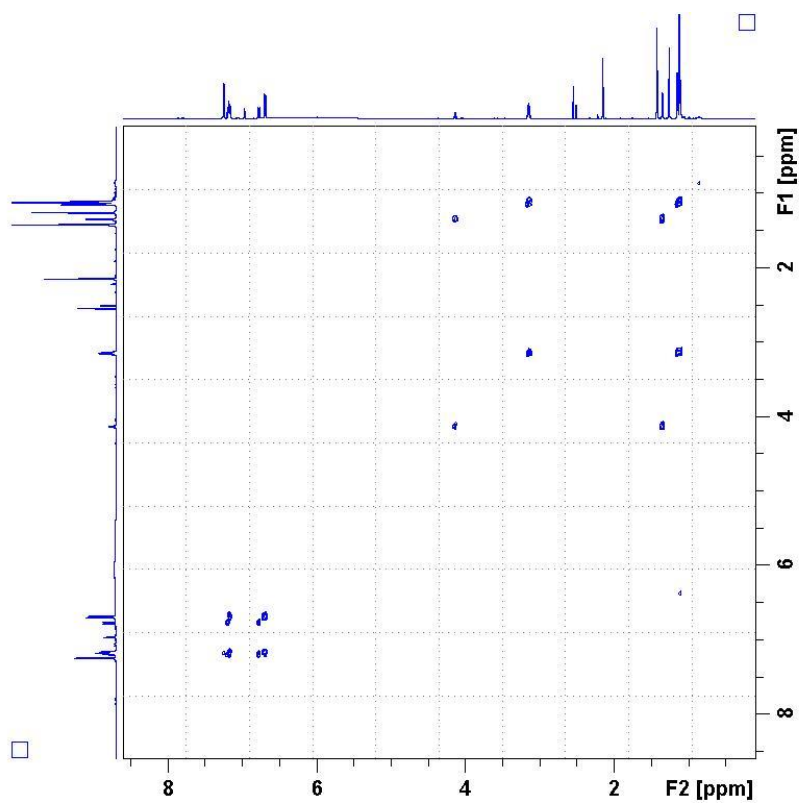

Figure S16. COSY spectrum of **AHB74**.

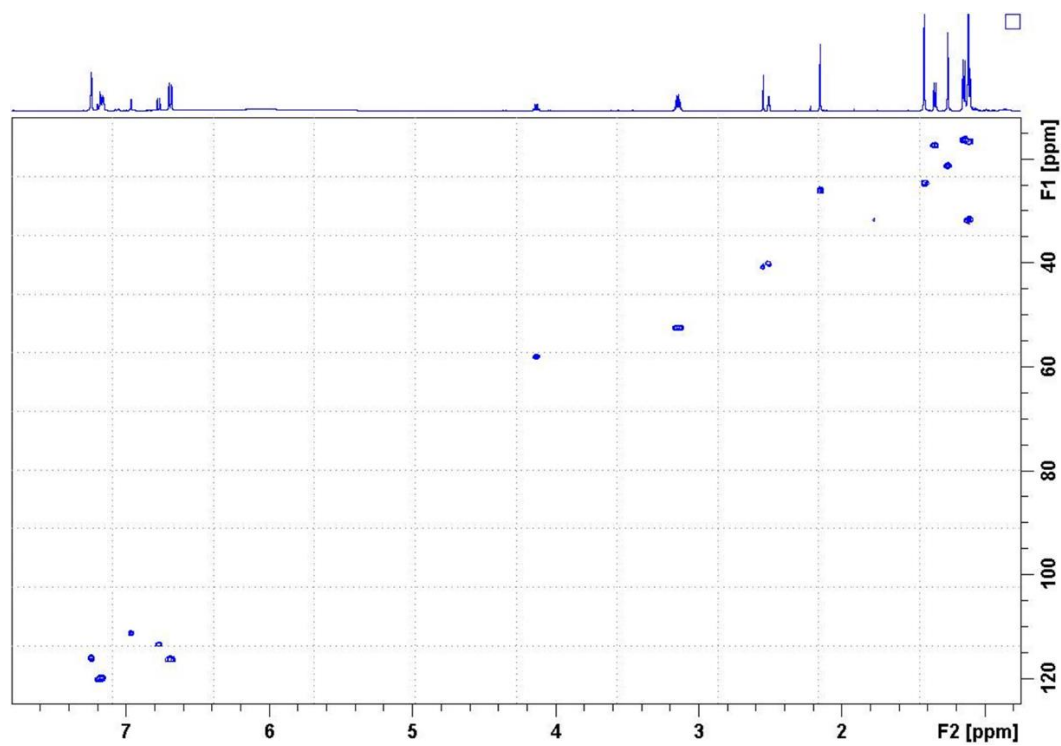

Figure S17. HSQC spectrum of AHB74.

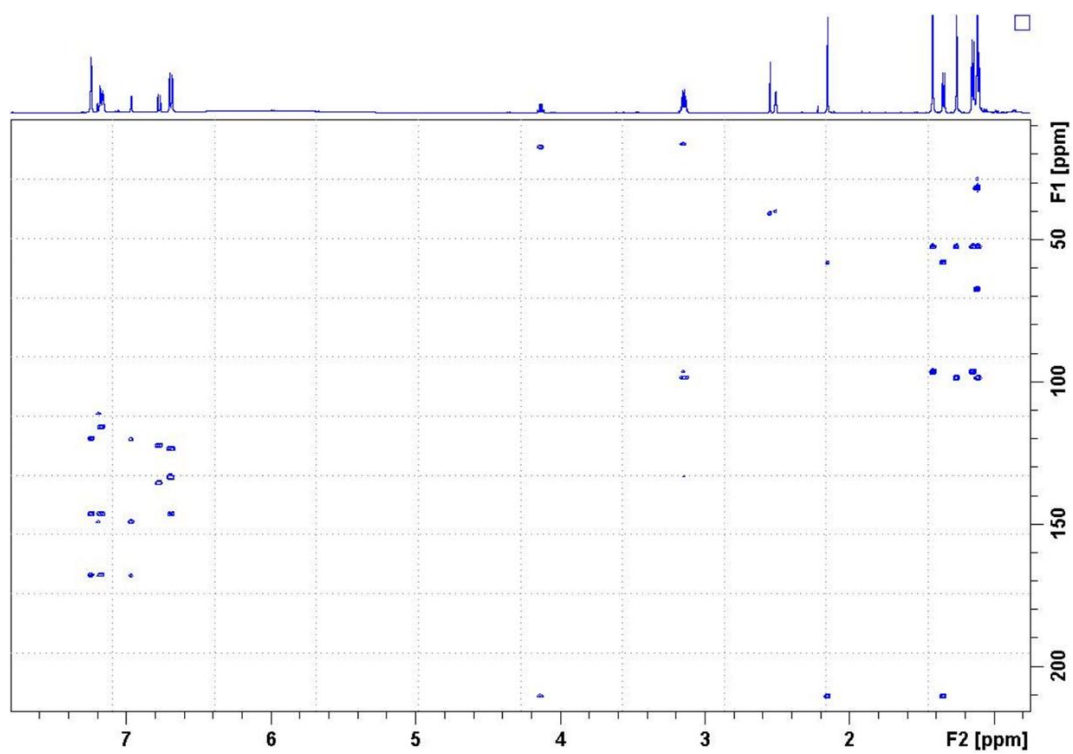

Figure S18. HMBC spectrum of AHB74.

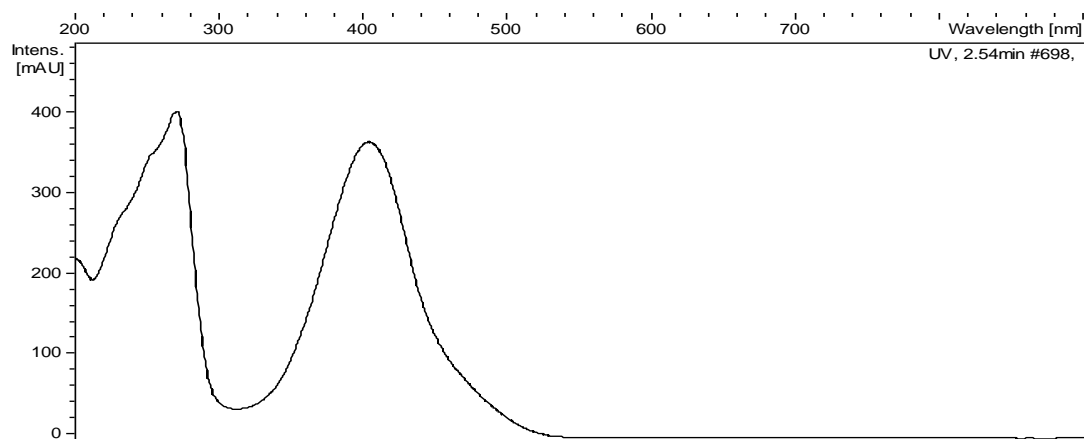

**Figure S19.** UV-vis (DAD) spectrum of **AHB75**.

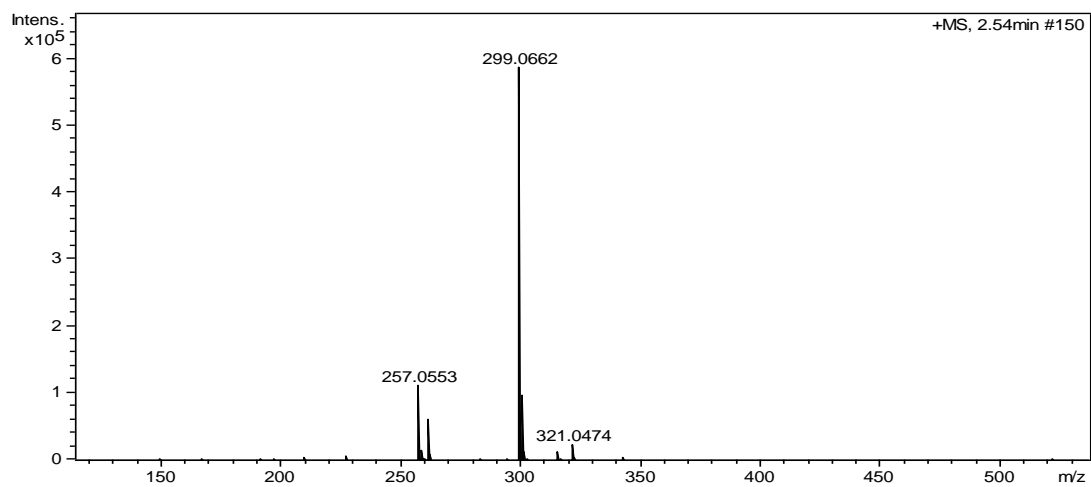

**Figure S20.** ESI-TOF HRMS spectrum of **AHB75**.

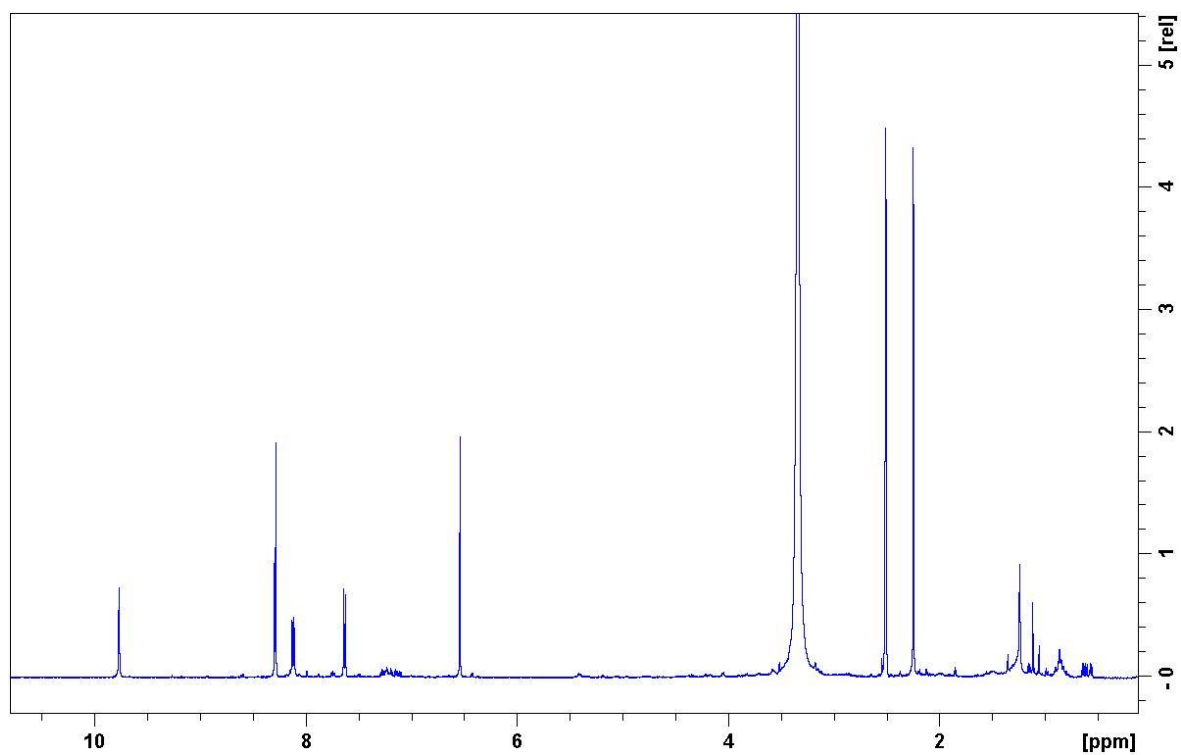

Figure S21.  $^1\text{H}$  spectrum of **AHB75** (DMSO- $d_6$ , 24 °C, 500 MHz).

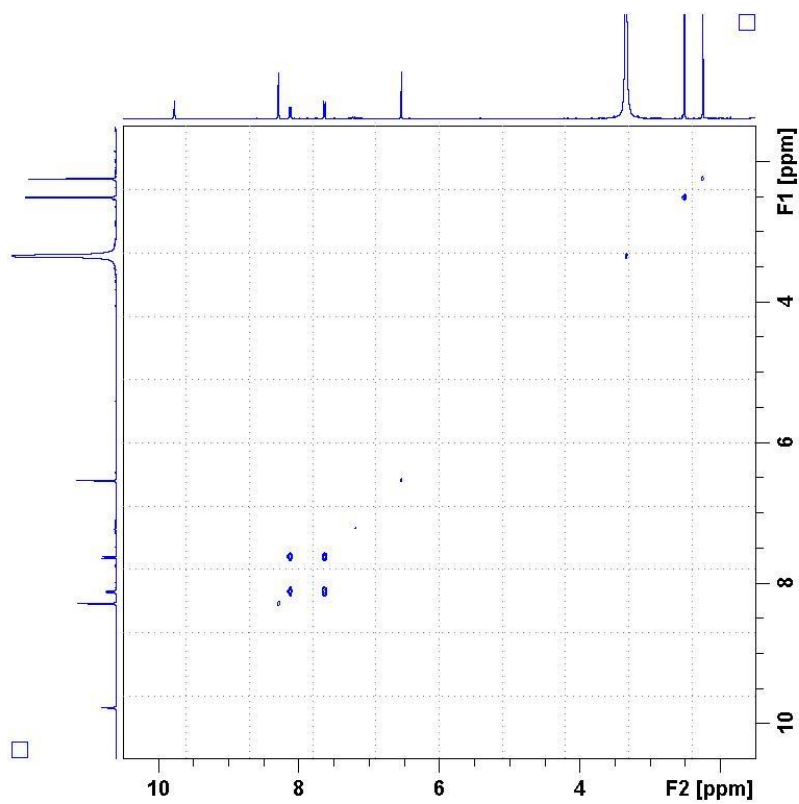

Figure S22. COSY spectrum of **AHB75**.

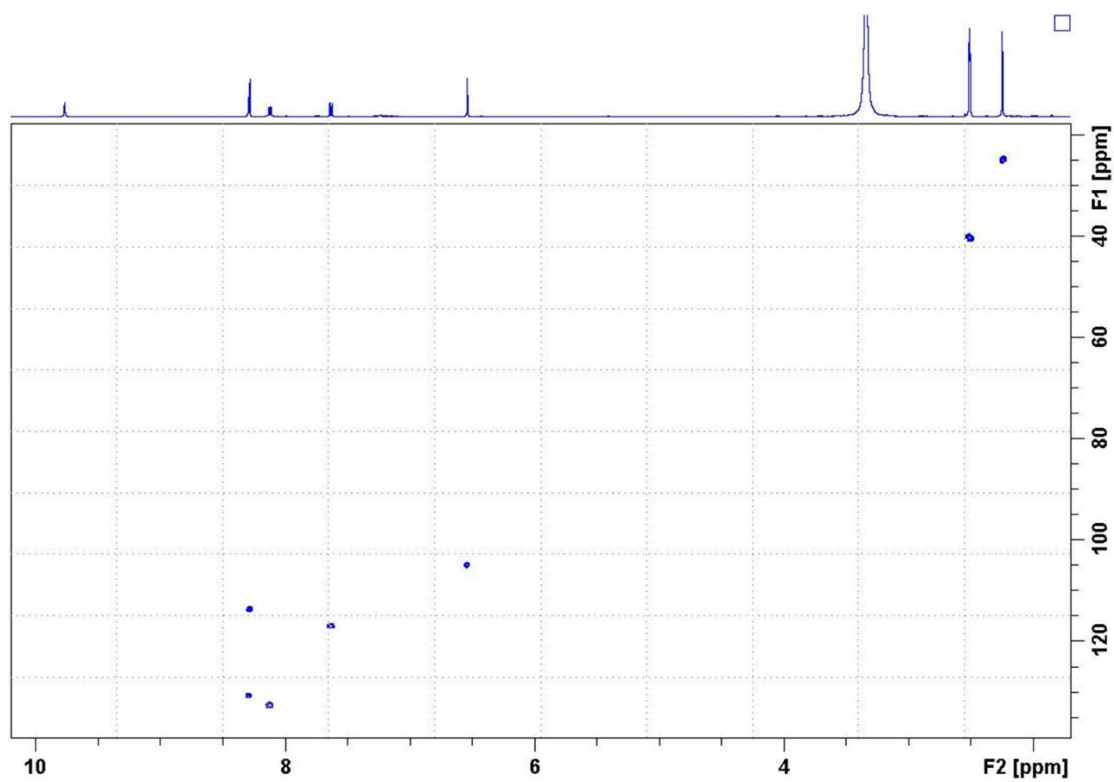

Figure S23. HSQC spectrum of **AHB75**.

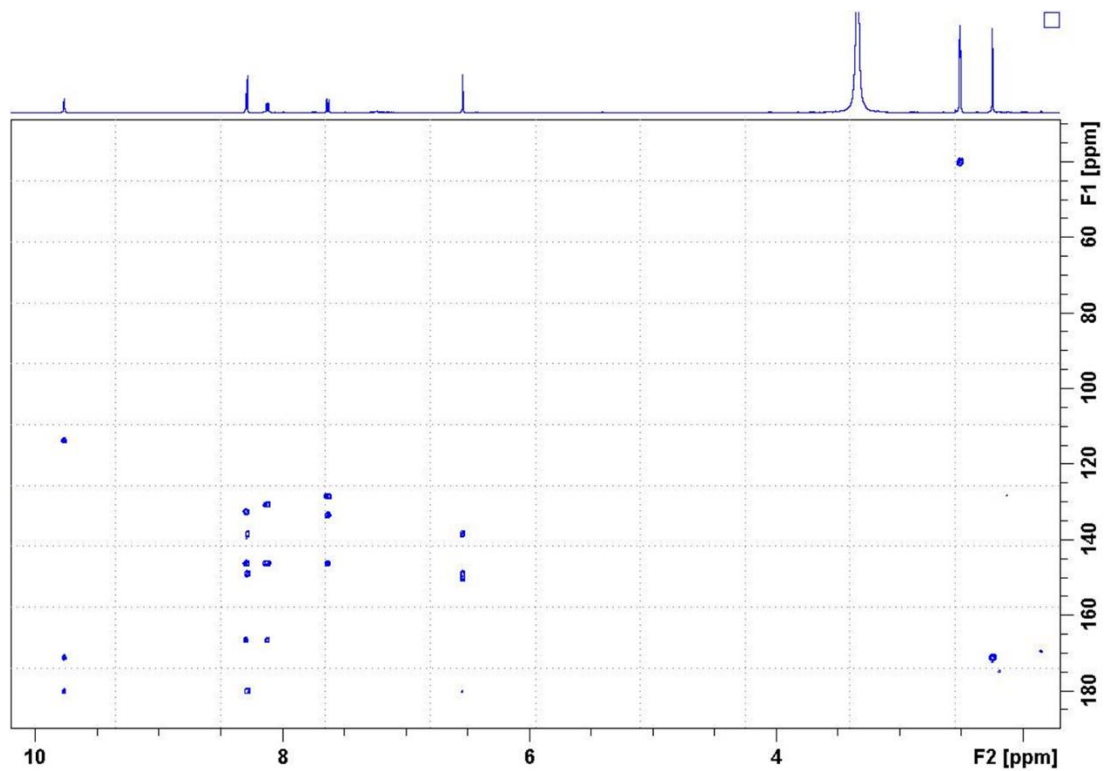

Figure S24. HMBC spectrum of **AHB75**.

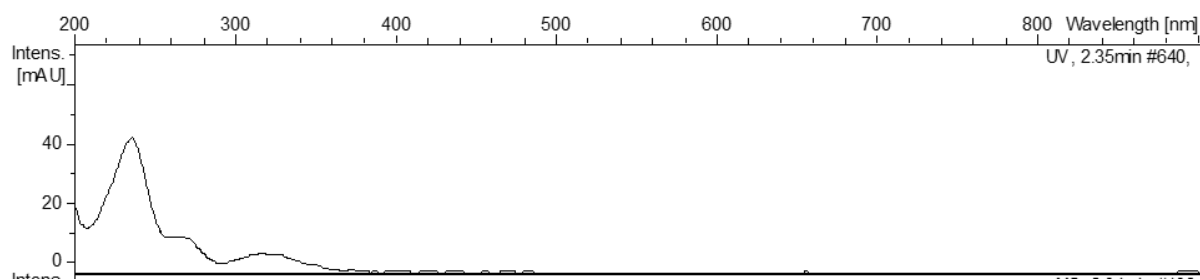

**Figure S25.** UV-vis (DAD) spectrum of **AHB76**.

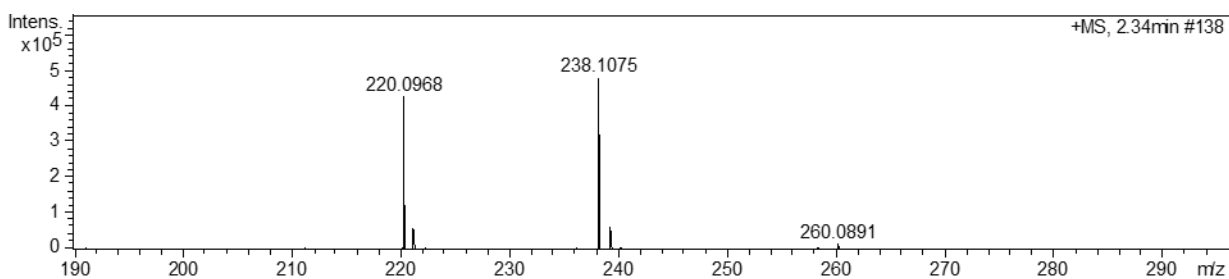

**Figure S26.** ESI-TOF HRMS spectrum of **AHB76**.

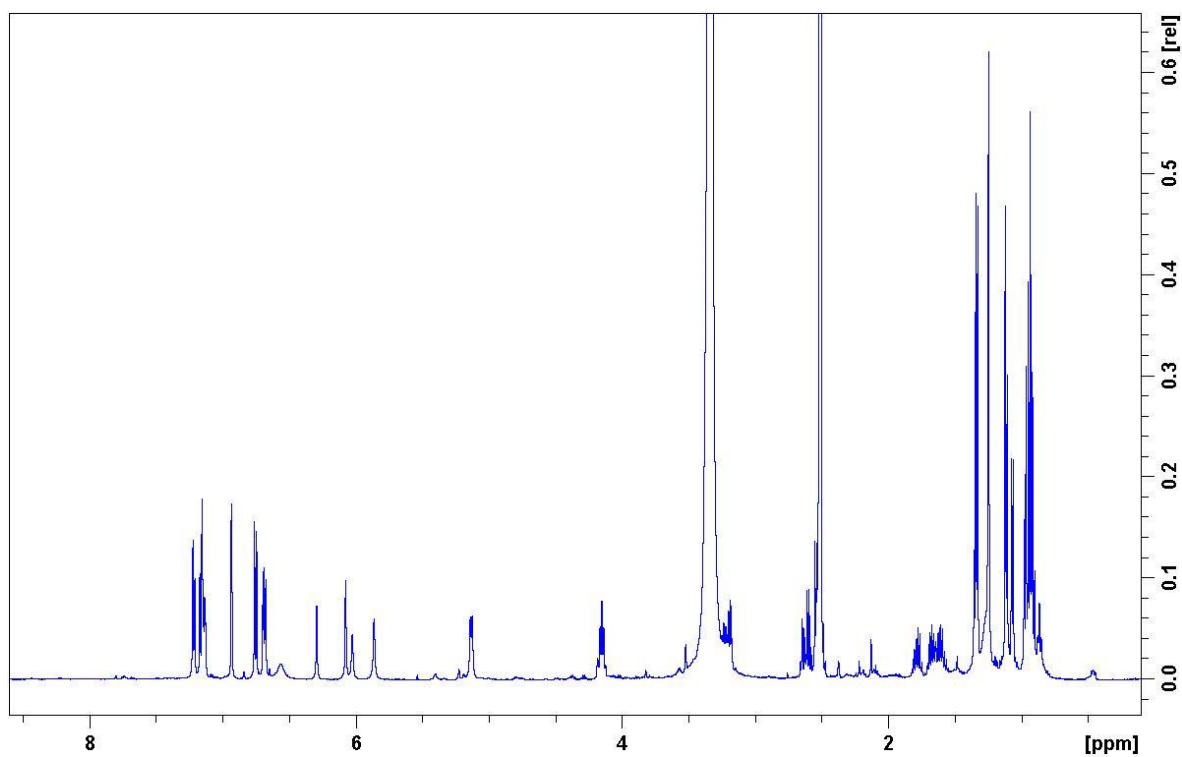

Figure 7  $^1\text{H}$  spectrum of **AHB76** (DMSO- $d_6$ , 24 °C, 500 MHz).

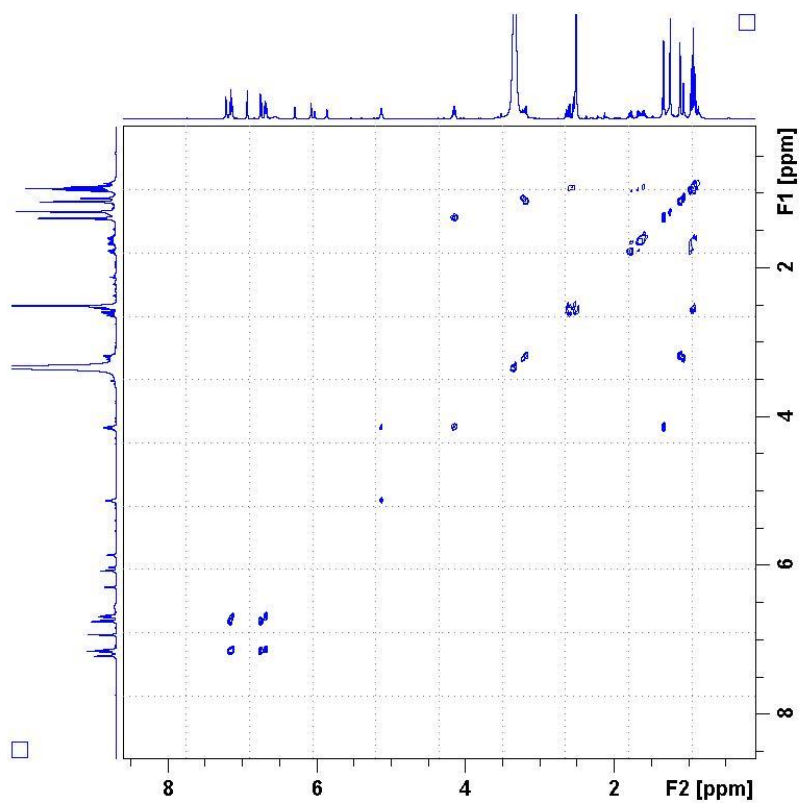

Figure S28. COSY spectrum of **AHB76**.



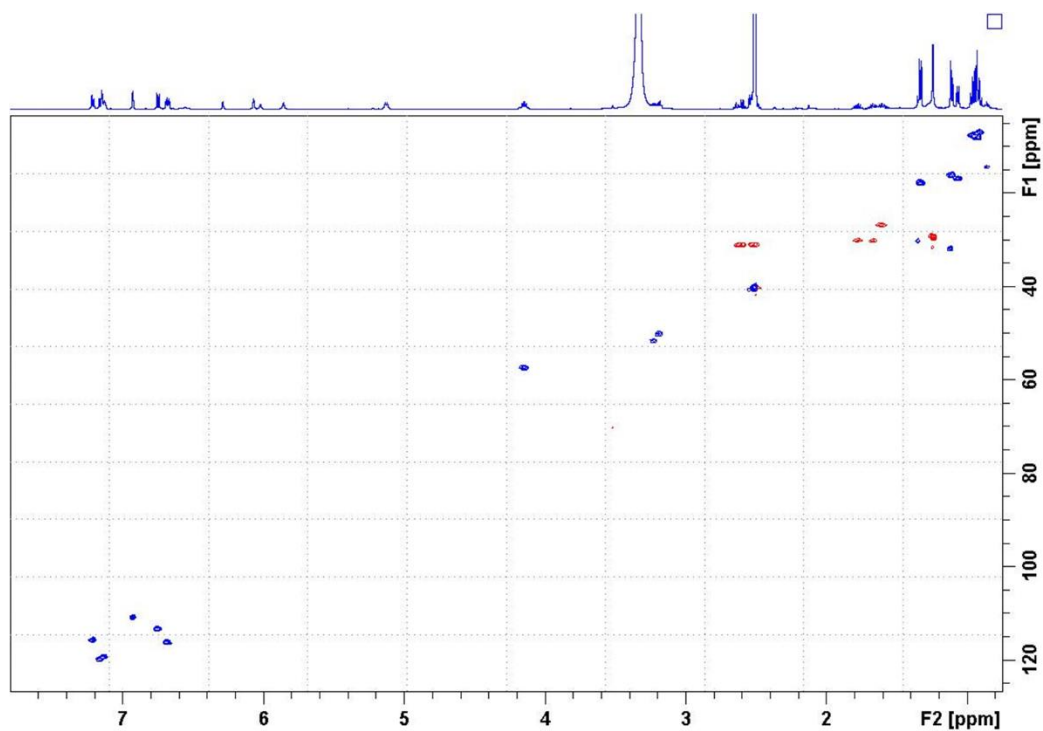

Figure S29. HSQC spectrum of **AHB76**.

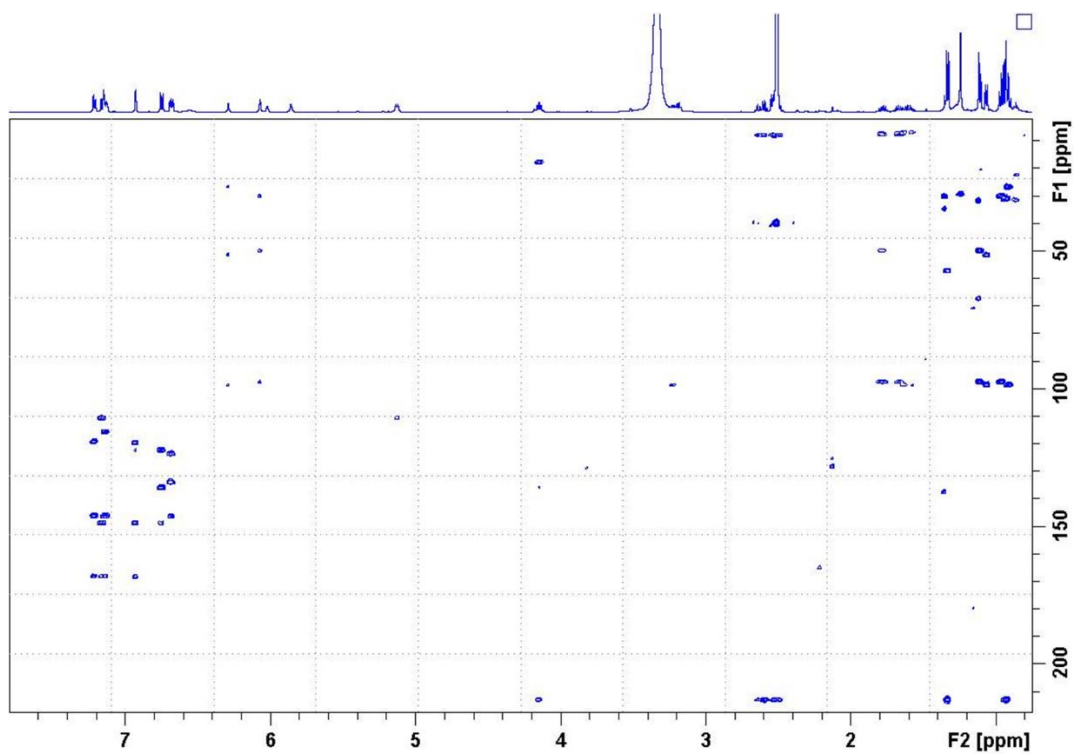

Figure S309. HMBC spectrum of **AHB76**.

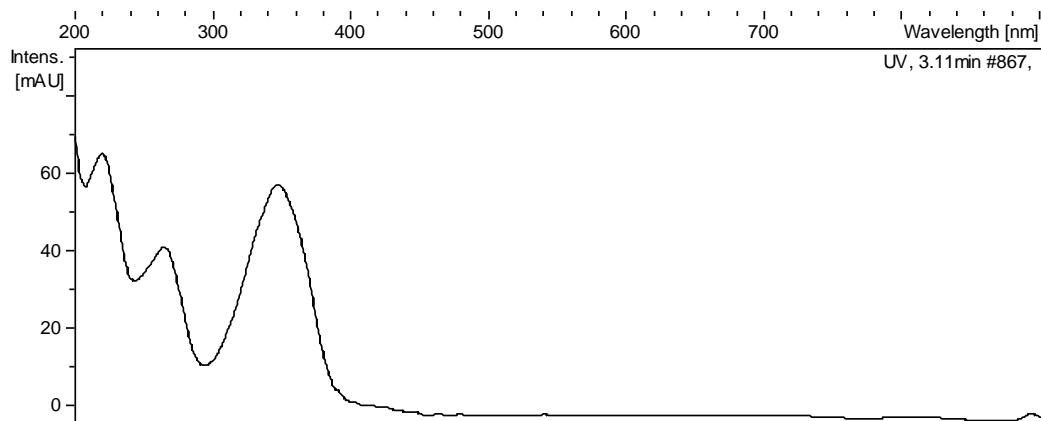

Figure S31. UV-vis (DAD) spectrum of **AHB77**.

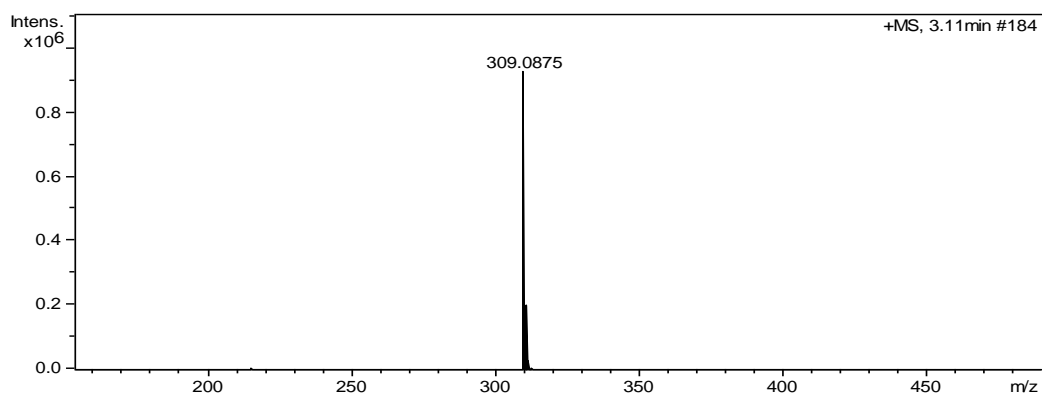

Figure S32. ESI-TOF HRMS spectrum of **AHB77**.

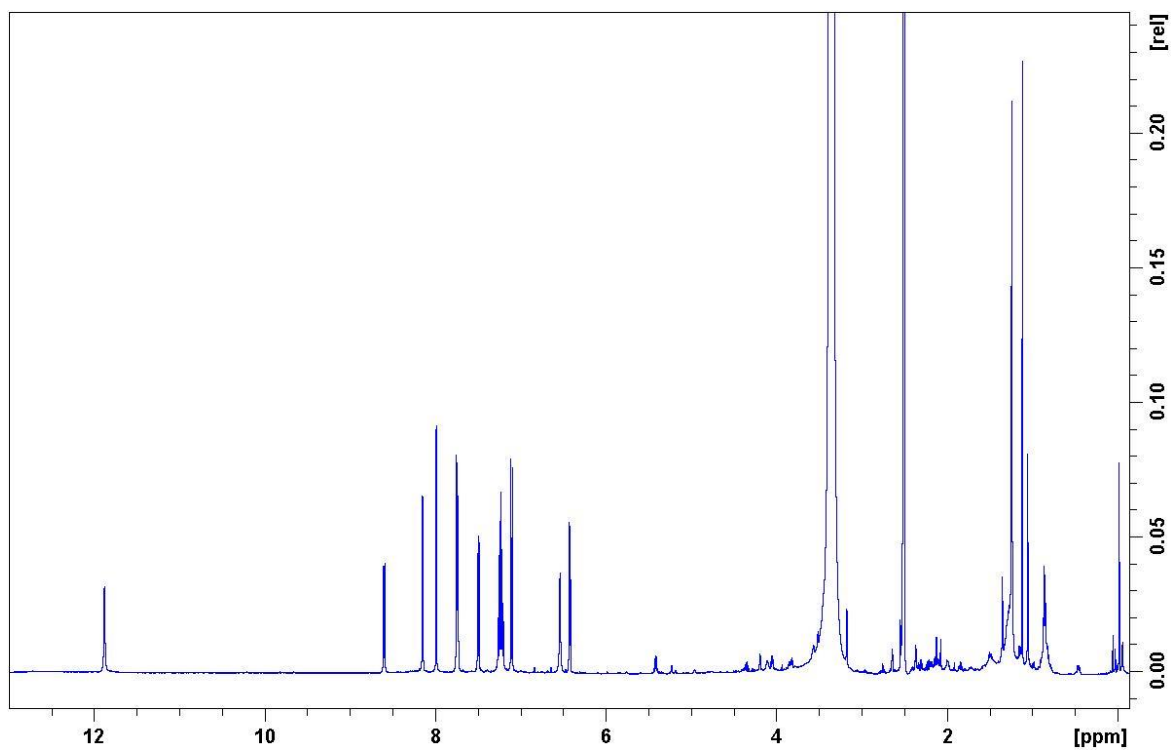

Figure S33.  $^1\text{H}$  spectrum of **AHB77** (DMSO- $d_6$ , 24 °C, 500 MHz).

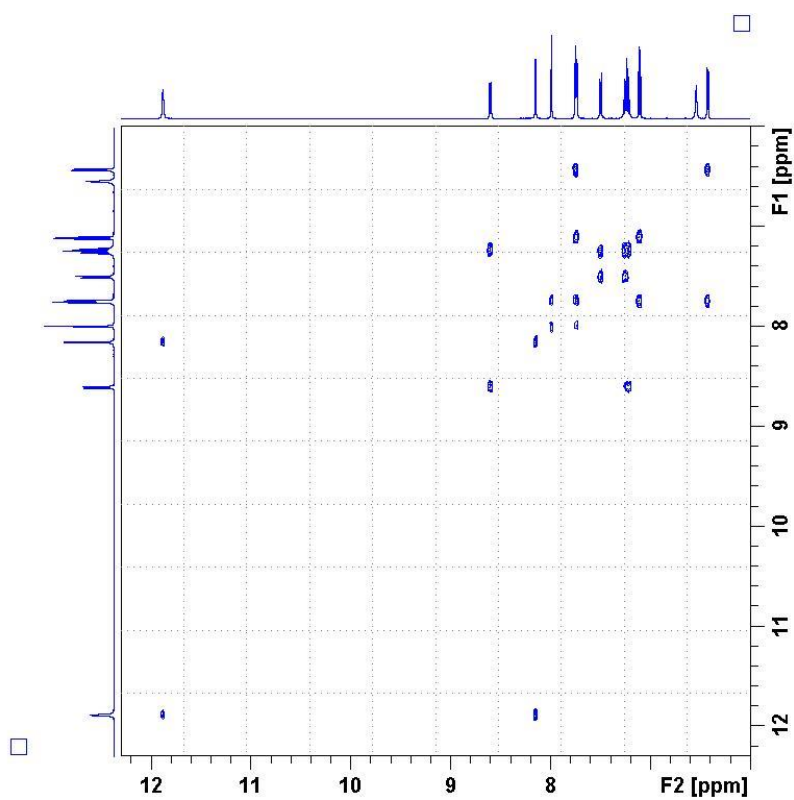

Figure S34. COSY spectrum of **AHB77**.

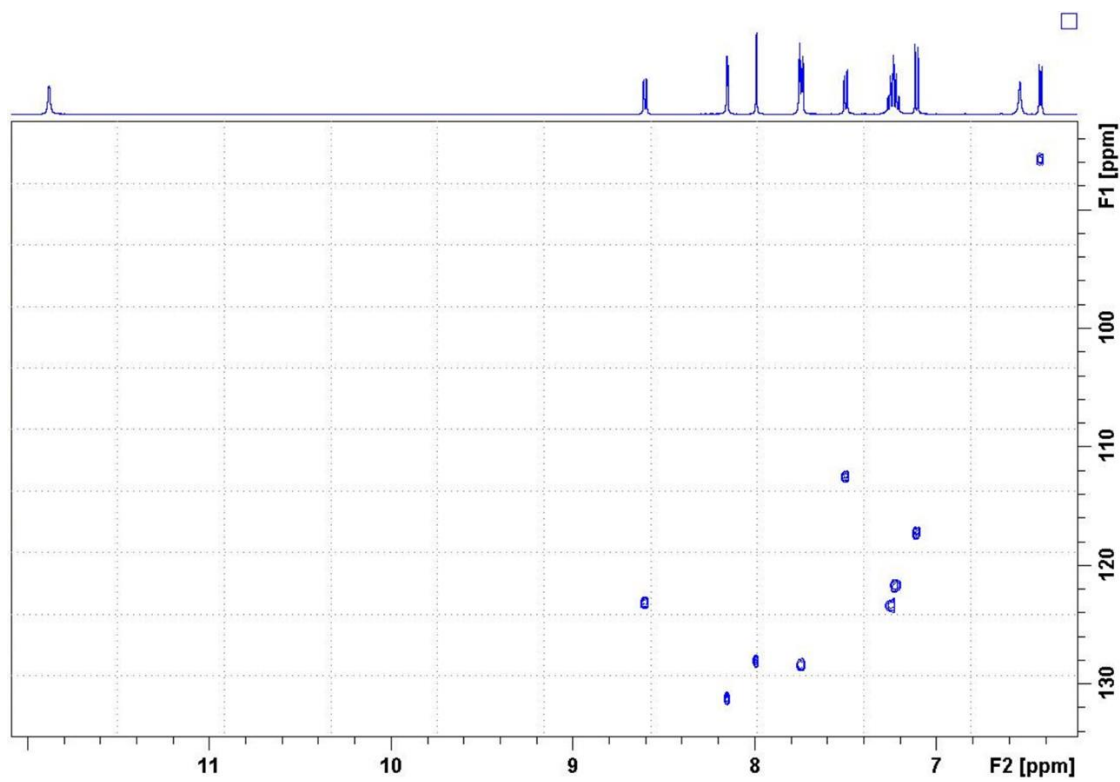

Figure S35. HSQC spectrum of **AHB77**.

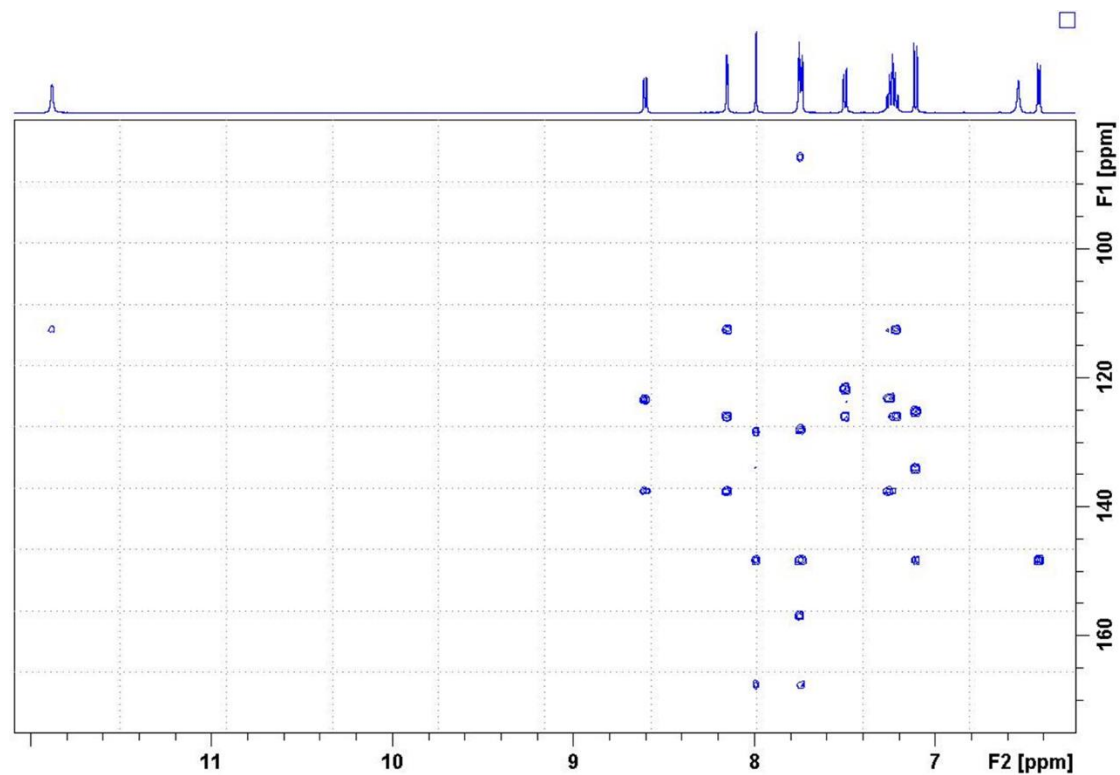

Figure S36. HMBC spectrum of **AHB77**.

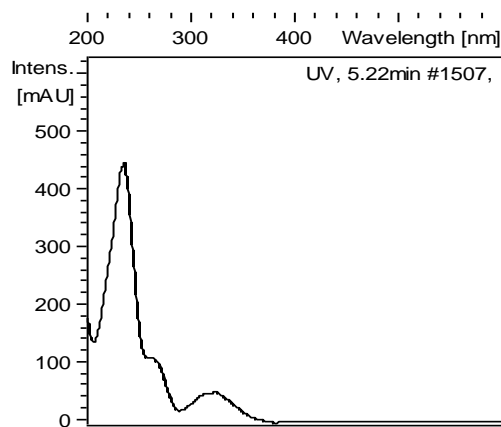

**Figure S37.** UV-vis (DAD) spectrum of **AHB118**.

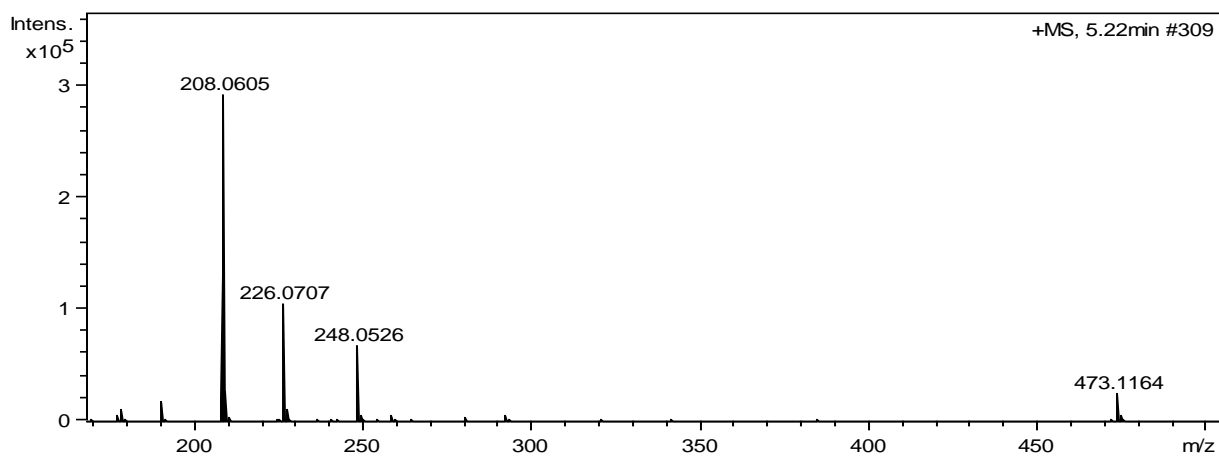

**Figure S38.** ESI-TOF HRMS spectrum of **AHB118**.

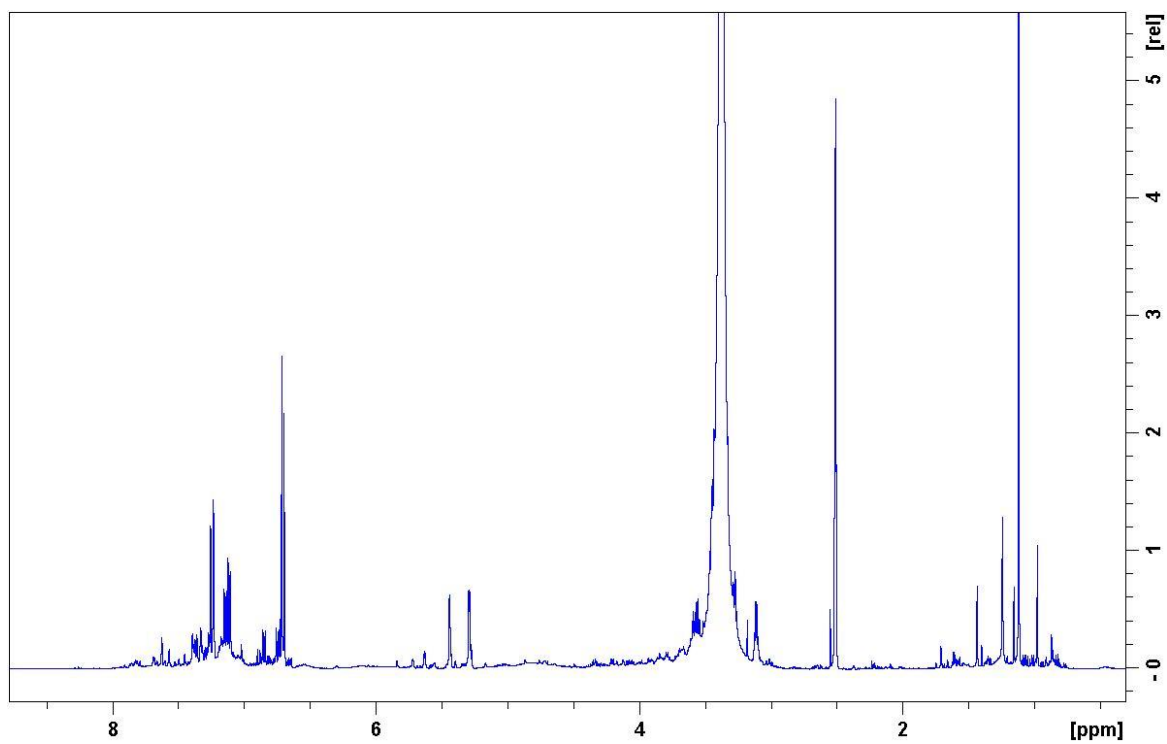

Figure S39.  $^1\text{H}$  spectrum of **AHB118** (DMSO- $\text{d}_6$ , 24 °C, 500 MHz).

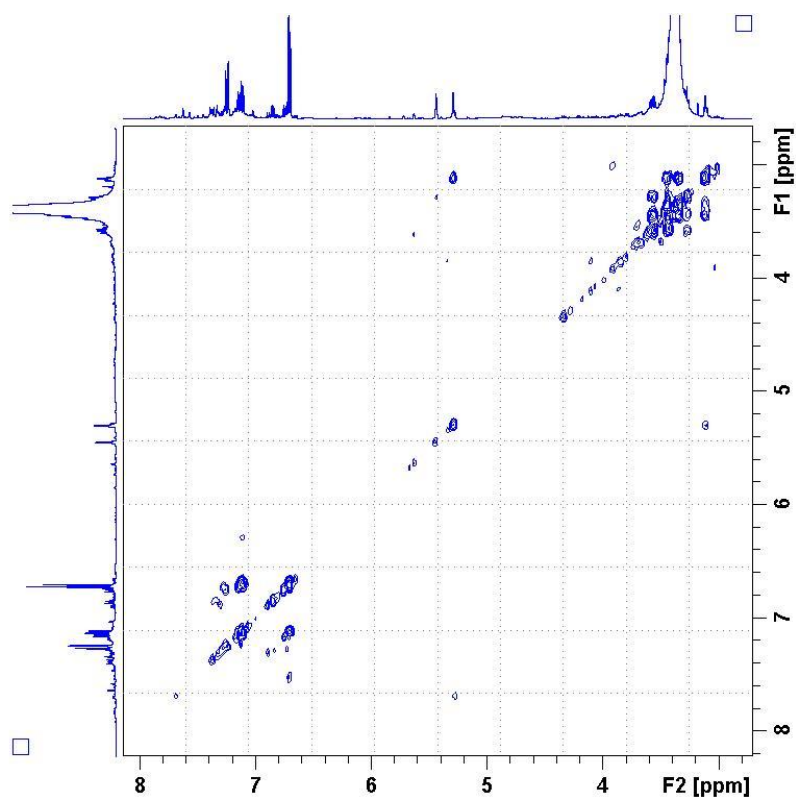

Figure S40. COSY spectrum of **AHB118**.

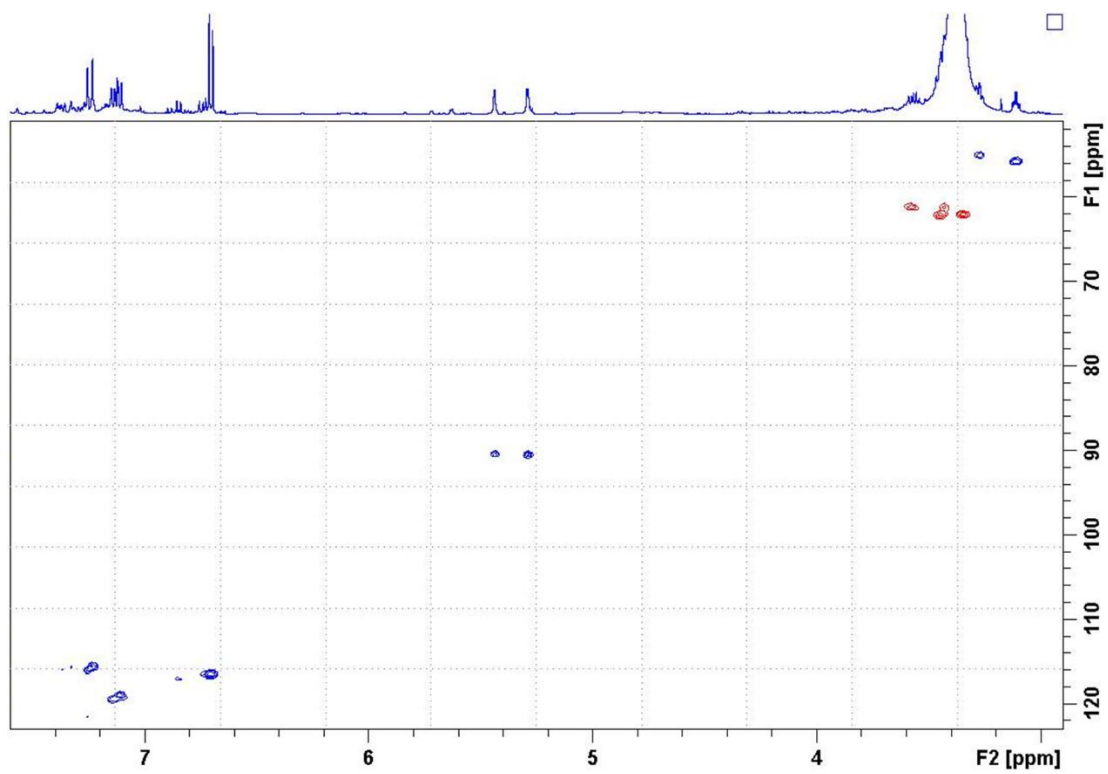

Figure S41. HSQC spectrum of AHB118.

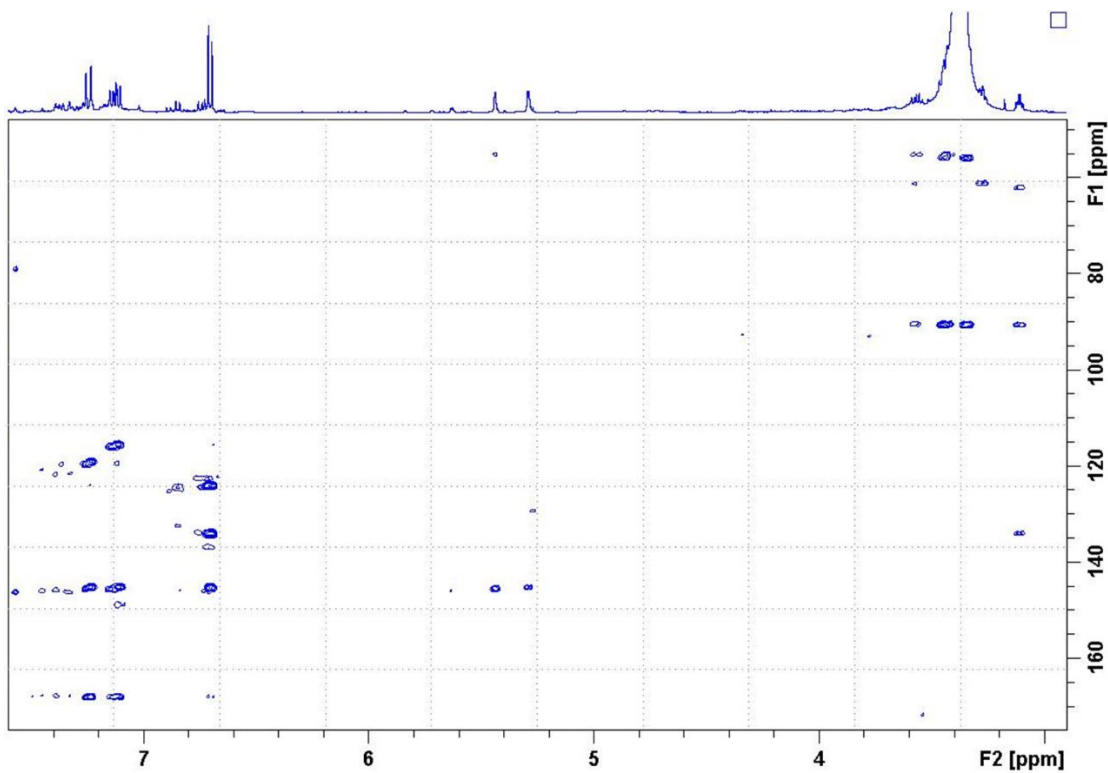

Figure S42. HMBC spectrum of AHB118.

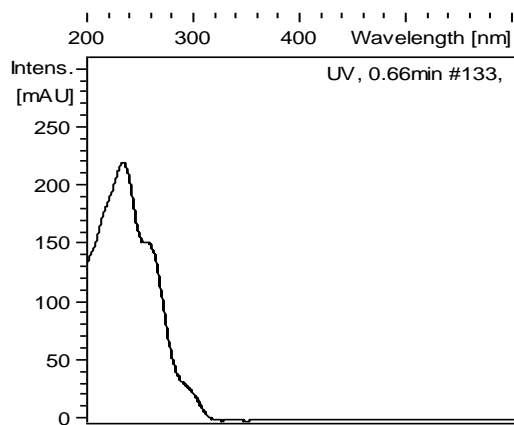

**Figure S43.** UV-vis (DAD) spectrum of **AHB119**.

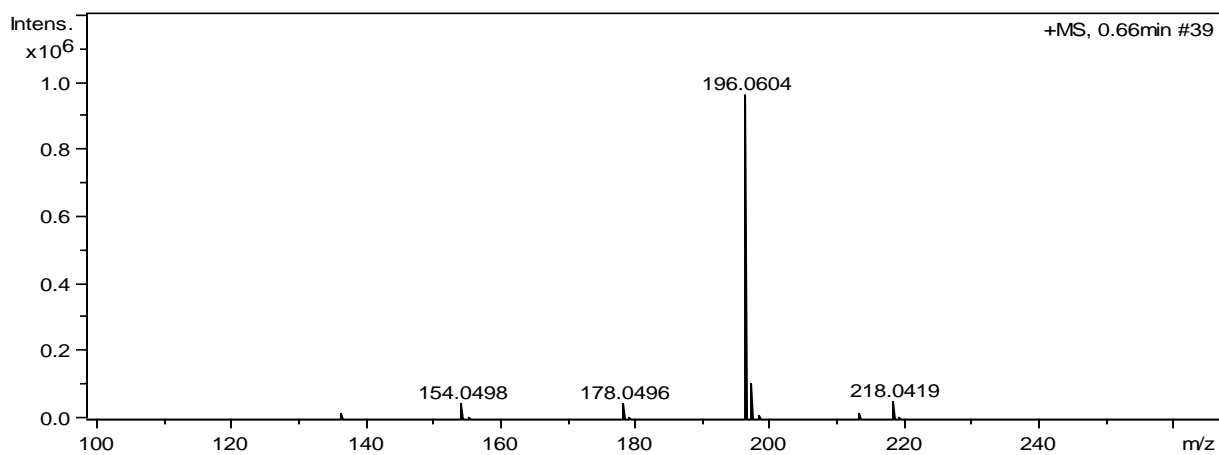

**Figure S44.** ESI-TOF HRMS spectrum of **AHB119**.



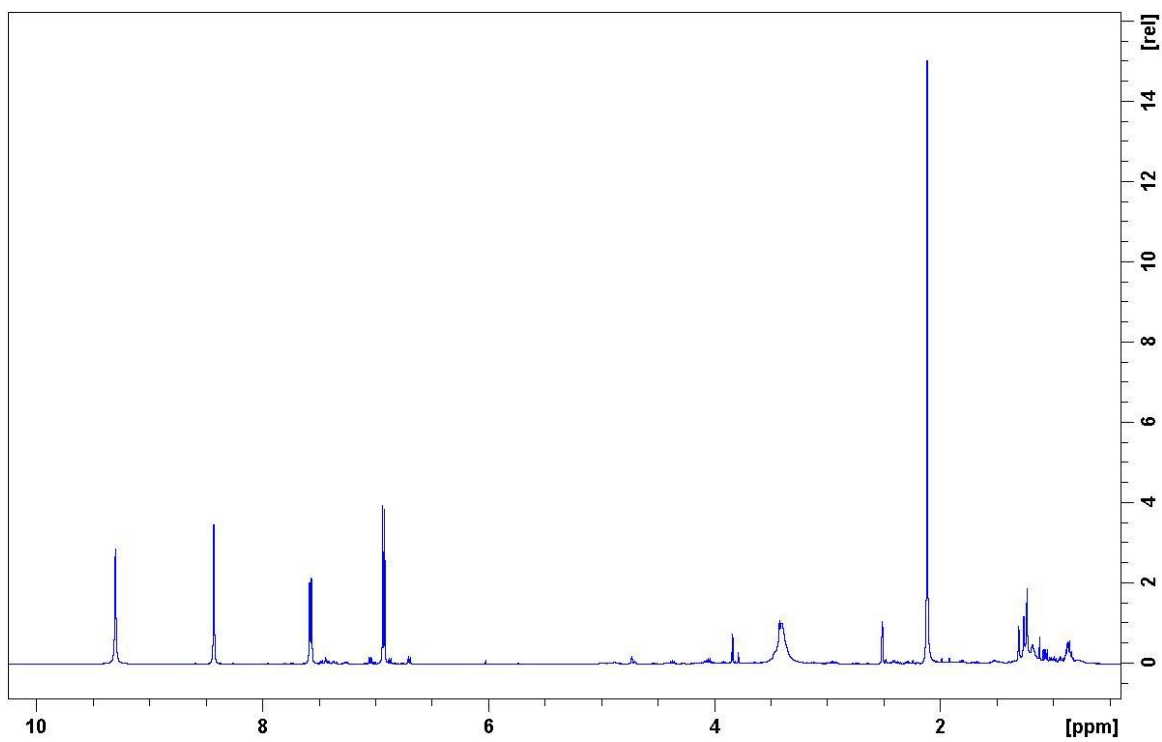

Figure S45.  $^1\text{H}$  spectrum of **AHB119** (DMSO- $d_6$ , 24 °C, 500 MHz).

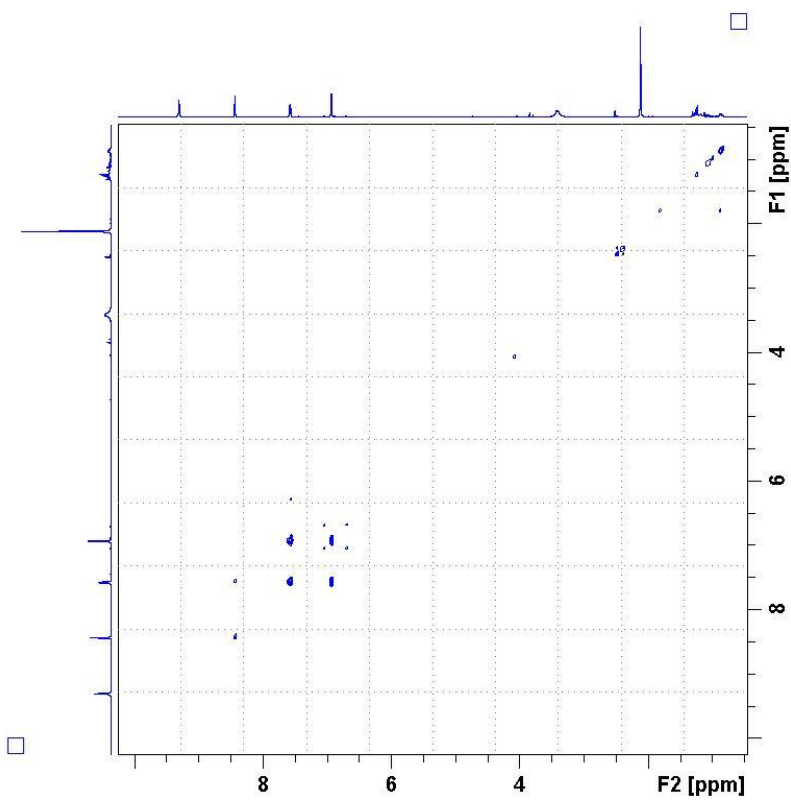

Figure S46. COSY spectrum of **AHB119**.

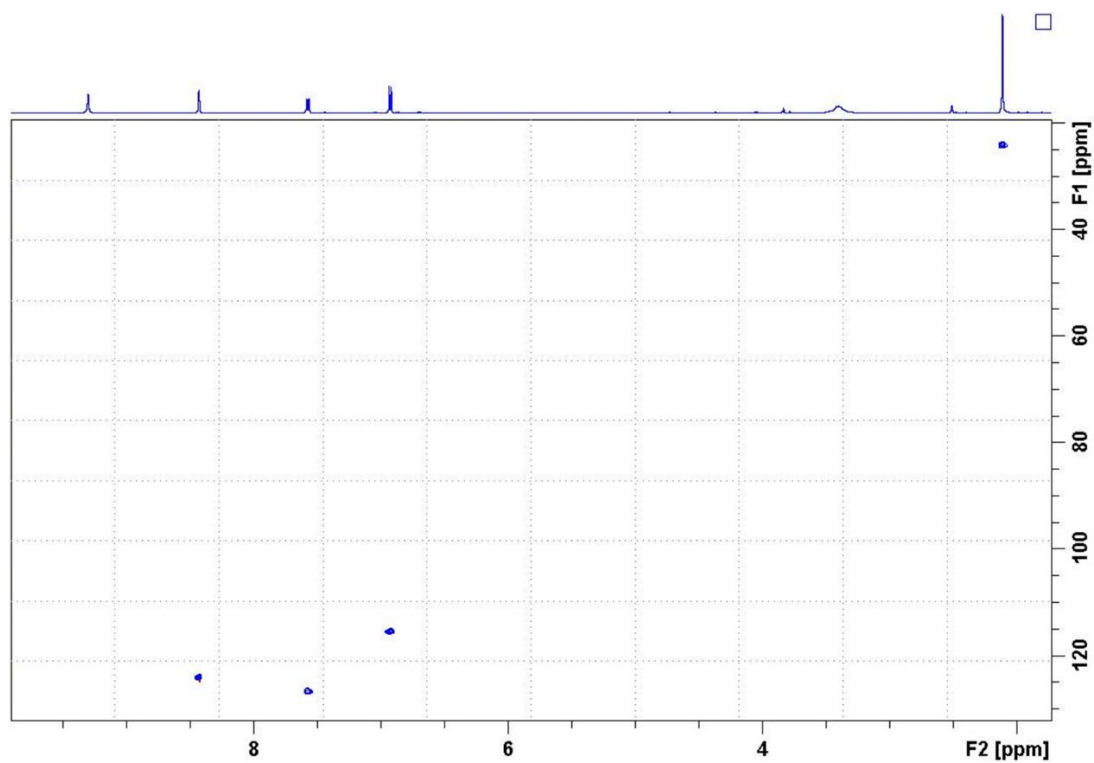

Figure S47. HSQC spectrum of AHB119.

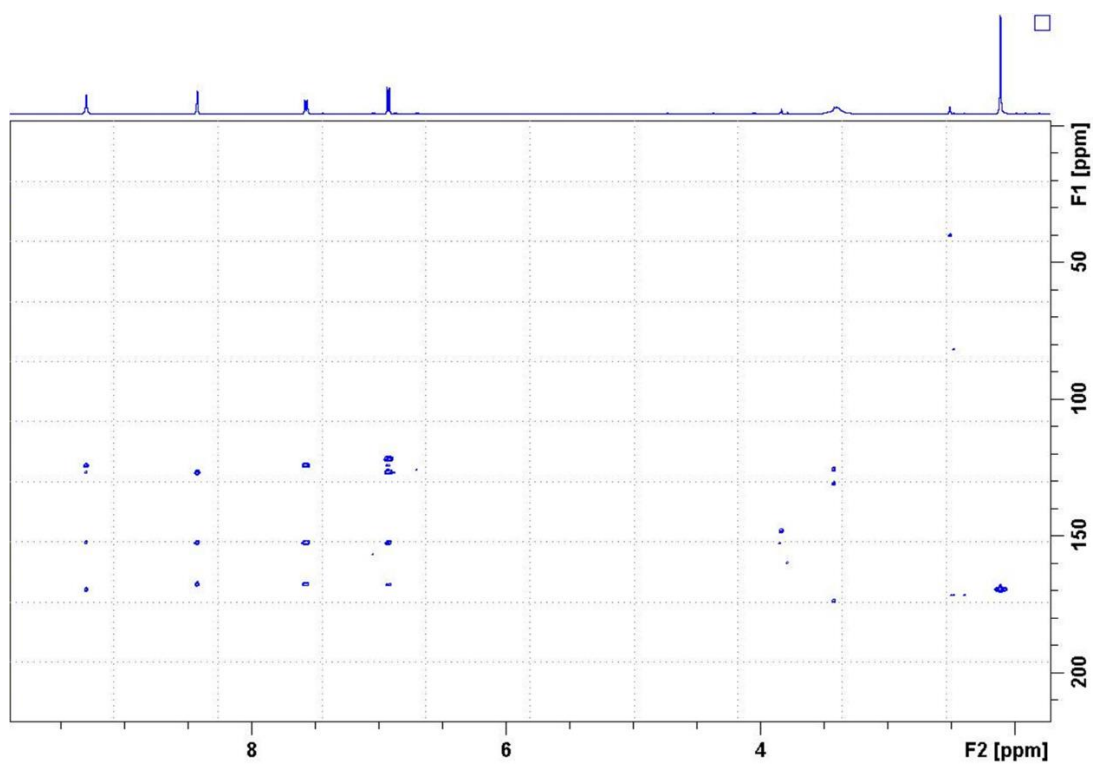

Figure S48. HMBC spectrum of AHB119.

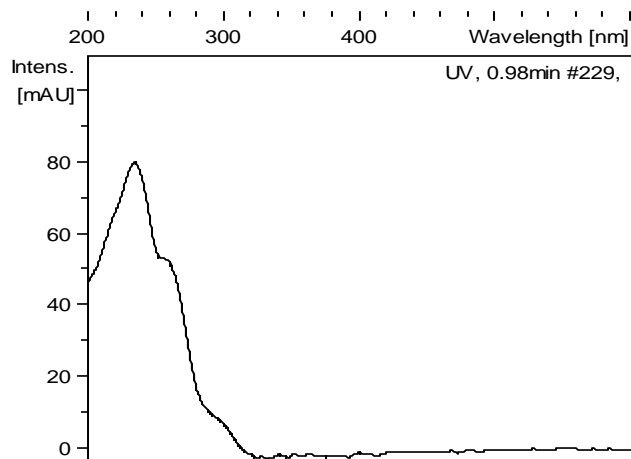

**Figure S49.** UV-vis (DAD) spectrum of **AHB120**.

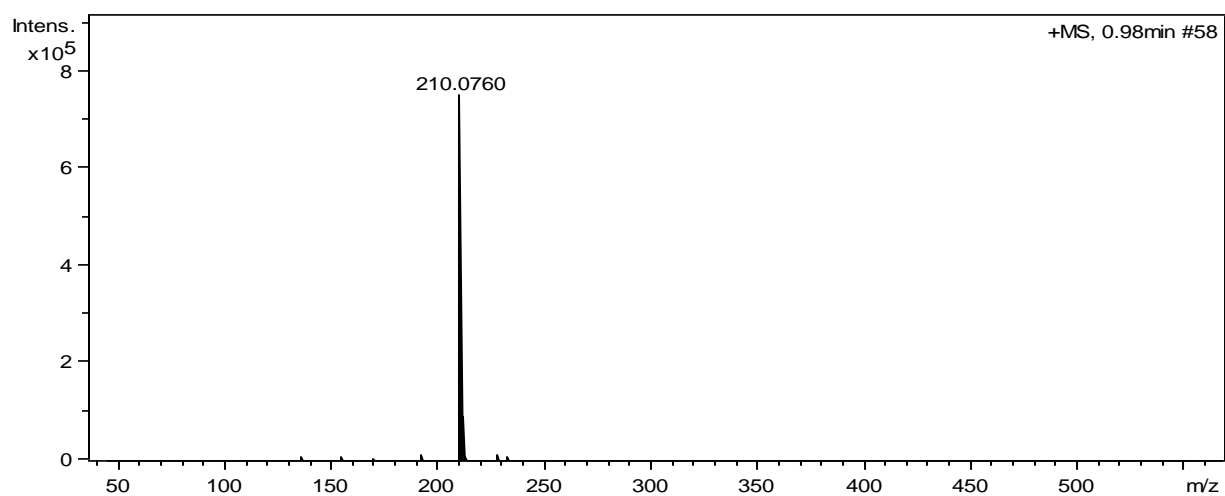

**Figure S50.** ESI-TOF HRMS spectrum of **AHB120**.

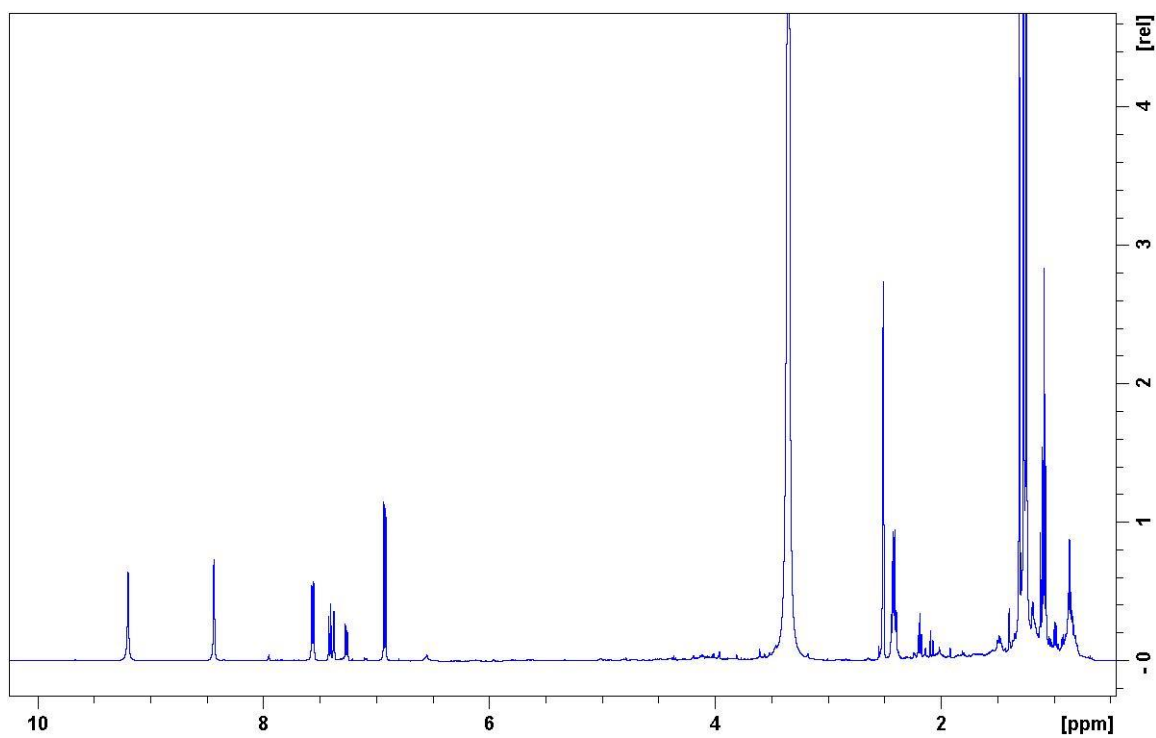

Figure S51.  $^1\text{H}$  spectrum of **AHB120** (DMSO- $d_6$ , 24 °C, 500 MHz).

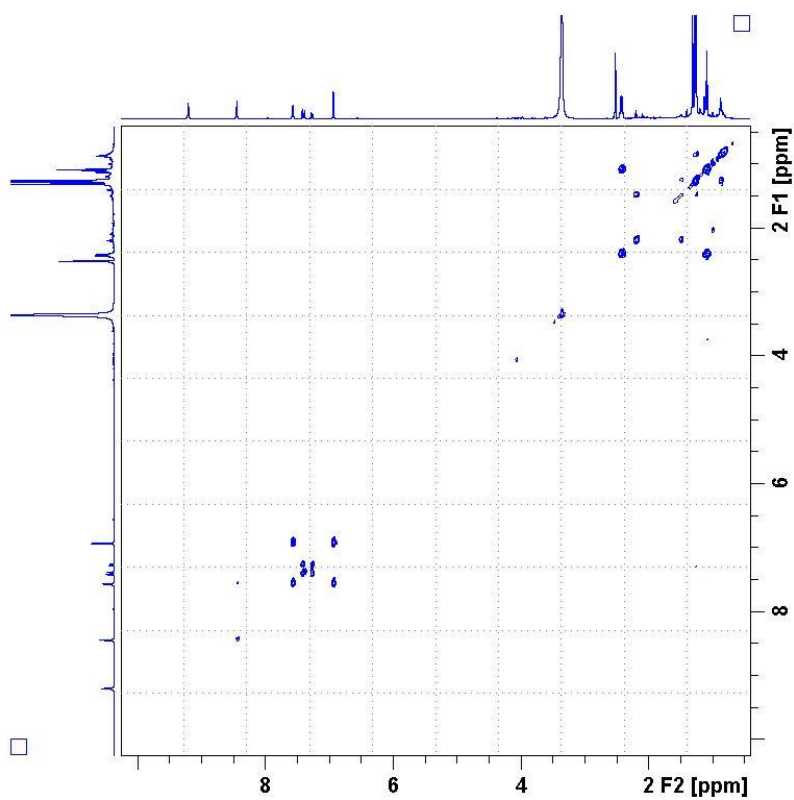

Figure S52. COSY spectrum of **AHB120**.

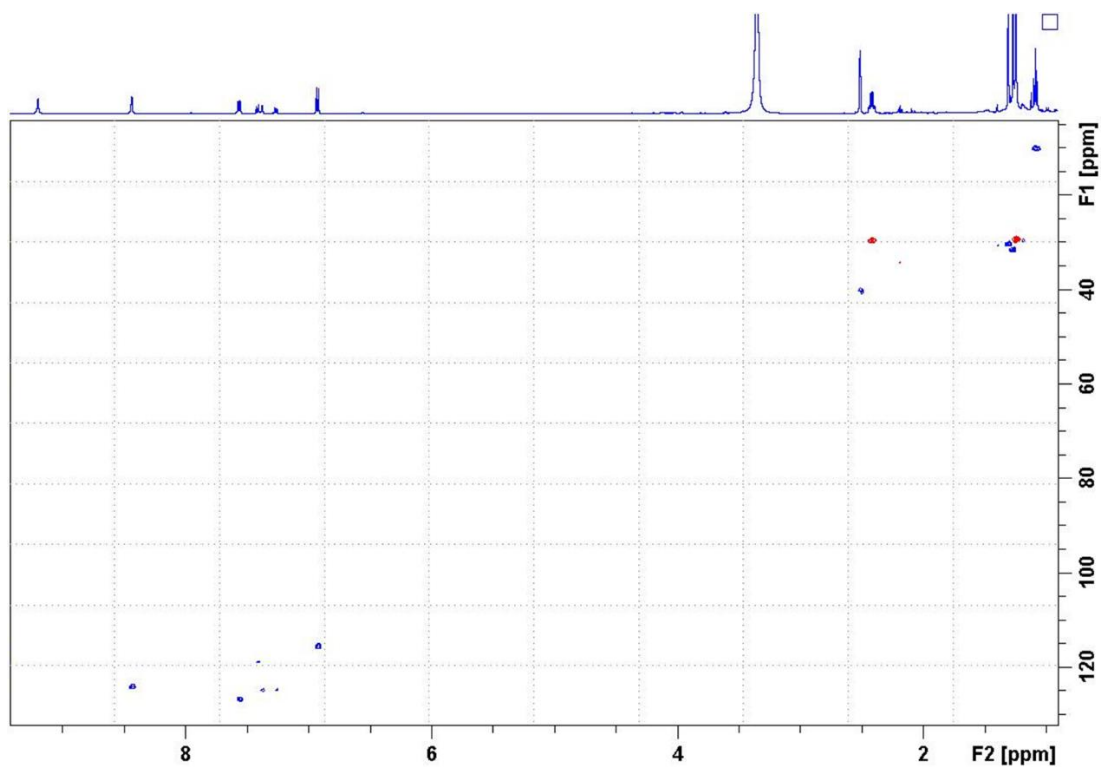

Figure S53. HSQC spectrum of AHB120.

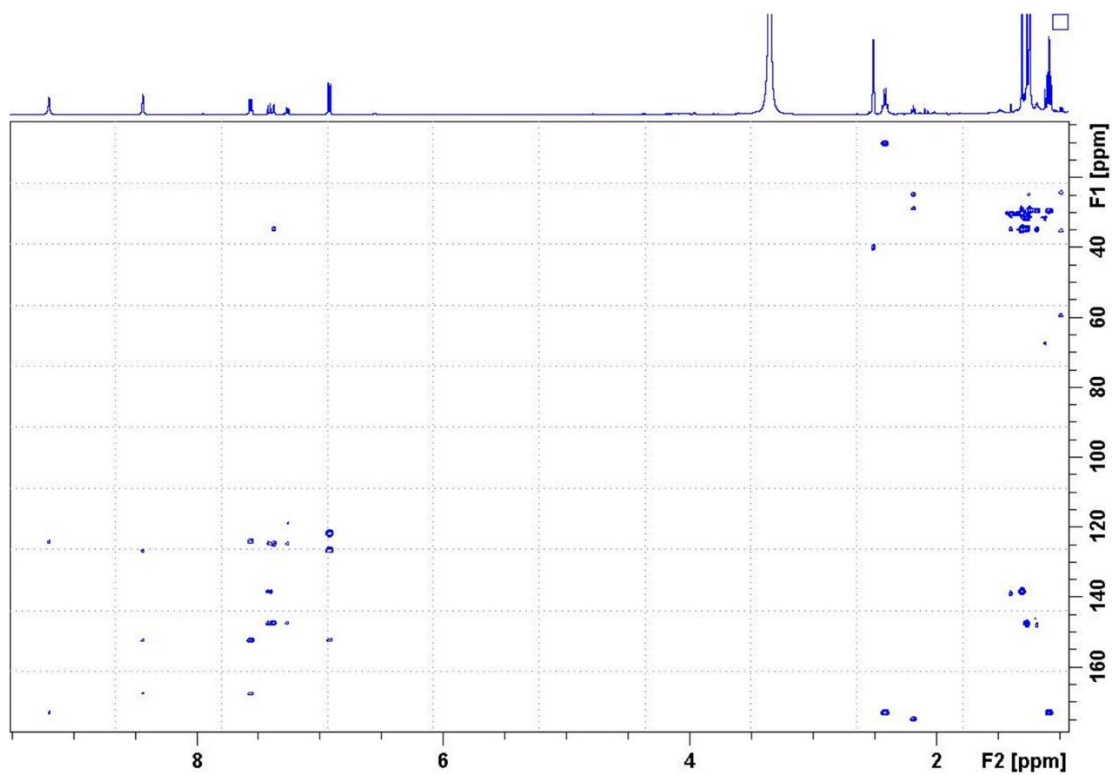

Figure S54. HMBC spectrum of AHB120.
